# Supplementary material for: A Maxwell–Elasto-Brittle rheology for sea ice modelling
Source: Copernicus journal article supplement (doi:10.5194/tc-2015-200), 2016-01-15
Supplement: Supplementary file [file tc-2015-200-AC2-supplement.pdf]

# A Maxwell-Elasto-Brittle rheology for sea ice modelling

Véronique Dansereau<sup>1</sup>, Jérôme Weiss<sup>2</sup>, Pierre Saramito<sup>3</sup>, and Philippe Lattes<sup>4</sup>

<sup>1</sup>Laboratoire de Glaciologie et Géophysique de l'Environnement, CNRS UMR 5183, Université de Grenoble, Grenoble, France

<sup>2</sup>Institut des Sciences de la Terre, CNRS UMR 5275, Université de Grenoble, Grenoble, France

<sup>3</sup>Laboratoire Jean Kuntzmann, CNRS UMR 5224, Université de Grenoble, Grenoble, France

<sup>4</sup>TOTAL S.A. - DGEP/DEV/TEC/GEO, Paris, France

*Correspondence to:* Véronique Dansereau (veronique.dansereau@lgge.obs.ujf-grenoble.fr)

## 1 Abstract

A new rheological model is developed that builds on an elasto-brittle (EB) framework used for sea ice and rock mechanics, with the intent of representing both the small elastic deformations associated with fracturing processes and the larger deformations occurring along the faults/leads once the material is highly damaged and fragmented. A viscous-like relaxation term is added to the linear-elastic constitutive ~~relationship~~ law together with an effective viscosity that evolves according to the local level of damage of the material, like its elastic modulus. The coupling between the level of damage and both mechanical parameters is such that within an undamaged ice cover the viscosity is infinitely large and deformations are strictly elastic, while along highly damaged zones the elastic modulus vanishes and most of the stress is dissipated through permanent deformations. A healing mechanism is also introduced, counterbalancing the effects of damaging over large time scales. In this new model, named Maxwell-EB after the Maxwell rheology, the irreversible and reversible deformations are solved for simultaneously, hence drift velocities are defined naturally. First idealized simulations without advection show that the model reproduces the main characteristics of sea ice mechanics and deformation: strain localization, anisotropy, intermittency and associated scaling laws.

## 2 Introduction

Making reliable predictions of the drift and deformation of sea ice is becoming crucial nowadays for: (1) forecasting the opening of shipping routes across the Arctic, (2) evaluating mechanical constraints on offshore structures and ships and, at larger scales, (3) estimating the future evolution of both the summer and winter sea ice cover in the Arctic and Antarctic to anticipate its short to long-term, regional to global impacts on climate. Current operational modelling platforms, whether assimilating data or not (e.g., TOPAZ4 : Sakov et al. (2012), GIOPS : Smith et al. (2015)), and global

climate models including sea ice dynamics (e.g., the Coupled Model Intercomparison Project Phase 5 models involved in the IPCC Fifth Assessment Report (Flato et al., 2013)) are based on the same mechanical framework for sea ice developed in the late seventies: the Hibler Viscous-Plastic (VP) model (Hibler, 1977, 1979). With this approach, the ice creeps very slowly as a viscous fluid under small stresses and deforms plastically once exceeding a yield criterion. Yet, over the last decade, the viscous hypothesis and other underlying physical assumptions of this VP framework have been revisited and found inconsistent with the observed mechanical behaviour of sea ice—, in particular with respect to the order of magnitude of the observed strain-rates (Weiss et al., 2007; Rampal et al., 2008), the anisotropic distribution of ridges and leads and associated discontinuities in the velocity field on scales both small and large (> 100 km) (Hibler, 2001; Schulson, 2004; Coon et al., 2007), the relation between stresses and strain-rates (Weiss et al., 2007), the strength of pack ice in tension (Weiss et al., 2007; Coon et al., 2007) and the normal flow rule (Weiss et al., 2007). In the same line of ideas, recent modelling studies have demonstrated that while the VP model can represent with a certain level of accuracy the mean, global (> 100 km) drift of sea ice, it fails at reproducing the observed properties of sea ice deformation and that, especially at the fine scales (Lindsay et al., 2003; Kwok et al., 2008; Girard et al., 2009) relevant for operational modelling, thereby stressing the need to explore alternative rheologies.

Other continuum models have been developed lately with the aim of representing more accurately some important aspects of the mechanical behaviour of sea ice. Considering the discontinuous and anisotropic character of the pack, Schreyer et al. (2006) have suggested an elastic-decohesive model that explicitly accounts for the deformation arising from discontinuities in displacement across leads, the orientation of which is prescribed. Tsamados et al. (2013) have presented a model based on the rheology of Wilchinsky and Feltham (2006) that accounts for the subgrid scale anisotropy of the sea ice cover. Their framework incorporates an evolution equation for the orientation of ice floes, for which a diamond shape is assumed. Our present work shares the same objective as these previous initiatives : to build a continuum model for sea ice that is ~~physically~~ consistent with its observed mechanical behaviour. However, we chose to base our approach on a completely isotropic rheology and, by incorporating the relevant brittle mechanics concepts and long-range elastic interactions, aim to develop a model that reproduces the anisotropy and extreme gradients within the sea ice cover naturally, that is, without the need of treating velocity discontinuities explicitly nor prescribing lead orientations or floe shapes.

### 3 Background

Early on, sea ice scientists have suspected that the ~~sea-ice-cover~~ ice pack behaves in a brittle instead of a viscous manner, with some strain hardening in compression (Nye, 1973). ~~Studies~~ In later years, studies of fracture patterns, stresses and strains both in situ and in the laboratory have suggested that

the deformation of ~~sea ice~~ the sea ice cover is mostly accommodated by a mechanism of multiscale fracturing and frictional sliding. ~~By investigating the dispersion of ice buoys, recently showed that~~  
 60 ~~sea ice over the Arctic deforms in a heterogeneous and intermittent manner over spatial~~ (Marsan et al., 2004; Weiss et al., 2007; Schulson, 2004, 2006a). Recently, the availability of ice buoy and satellite data has allowed revealing three all-important characteristics of the deformation of sea ice: its strong localization in space, or *heterogeneity*, its localization in time, or *intermittency*, and its *anisotropy*.

On the one hand, the anisotropic nature of sea ice deformation is made evident by the analysis of  
 65 satellite imagery-derived ice motion products (e.g. Stern et al., 1995), which shows that high strain rates concentrate along oriented, linear-like faults, or leads, often termed "linear kinematic features" (Kwok, 2001). The signature of the strong heterogeneity and intermittency of sea ice deformation on the other hand, is the emergence of spatial and temporal scalings in the deformation fields over a wide range of scales. Using a coarse-graining procedure, Marsan et al. (2004) performed a scaling  
 70 analysis of the deformation of sea ice over the Arctic using the 3-days, 10 km × 10 km gridded RGPS deformation product. Doing so, they obtained a power-law relationship between the total deformation rate  $\langle \dot{\epsilon}_{tot} \rangle_l$  invariant and the corresponding averaging scale  $l$  of the form

$$\langle \dot{\epsilon}_{tot} \rangle_l \sim l^{-\beta} \quad (1)$$

with a constant exponent  $\beta > 0$ , indicating correlations in the deformation fields over at least 2  
 orders of magnitude in  $l$  and an increase in the mean strain rate with decreasing scale of observation,  
 75 in agreement with a strong spatial localization of the deformation. This coarse-graining calculation was later extended to ice buoy data (e.g., Rampal et al., 2008; Hutchings et al., 2011) which, with a higher temporal resolution than the RGPS data, allowed performing scaling analyses of Arctic sea ice deformation in the temporal dimension as well, over space scales of 300 m to 300 km and time scales  
~~of~~. Using the dispersion rate of buoys as a proxy for the strain rate, Rampal et al. (2008) obtained  
 80 a power-law relationship between the total deformation rate  $\langle \dot{\epsilon}_{tot} \rangle_t$  computed at a chosen space scale and the time scale of observation  $t$ .

$$\langle \dot{\epsilon}_{tot} \rangle_t \sim t^{-\gamma} \quad (2)$$

with a constant exponent  $\gamma > 0$  over 2 orders of magnitudes in  $t$  (from 3 ~~hrs~~ hours to 3 months.  
~~The strong-~~), indicating an increase of strain rates with decreasing time scale consistent with an  
intermittent deformation process. Their analyses furthermore revealed a space-time coupling in the  
 85 scaling laws revealed by their analyses are between the spatial and temporal scaling laws, consistent  
 with (1) a brittle-type material in which permanent deformations are accommodated by displacements along fractures and fault planes over a wide range of scales and (2) long-range elastic interactions, allowing for small, local perturbations to trigger much larger damaging events within the ice pack (Marsan and Weiss, 2010).

90 A close comparison can be made between the deformation of sea ice and that of the Earth crust,  
in which brittle fracturing and Coulomb stress redistribution also take place and for which scaling  
properties have been recognized for years (Kagan and Knopoff, 1980; Kagan, 1991; Kagan and  
Jackson, 1991; King et al., 1994; Turcotte, 1992; Stein, 1999). Recently, Marsan and Weiss (2010)  
95 established a formal analogy between the mechanical behaviour of sea ice and that of the Earth  
crust by demonstrating that the space-time coupling in the deformation of sea ice, estimated from  
*continuous* displacement fields, is equivalent to a coupled scaling of the *discrete* ice-fracturing events  
occurring along the leads, similar to that observed for earthquakes (Kagan, 1991; Kagan and Jackson,  
1991). The authors suggested that the similarity between sea ice and the Earth crust is attributable  
to a common cascading mechanism of earth-/ice-fracturing events that extends the influence of local  
100 events to longer durations and larger areas than their direct aftershocks.

In the case of rocks, attempts to simulate brittle deformation were first made using random spring-  
like models. Combining local threshold mechanics and long-range elastic interactions, these success-  
fully reproduced the strong localization of rupture in both space and time, the clustering of rupture  
events along faults and the multifractal properties of strain fields (Cowie et al., 1993, 1995). Build-  
105 ing on similar linear-elastic laws and introducing some strain softening at the micro scale, the failure  
model of Tang (1997) succeeded in simulating the progressive failure leading to the macroscopic  
non-linear behaviour of brittle rock, thereby ~~processing discontinuum mechanics by a continuum  
mechanics method~~ treating discontinuum mechanics with continuum mechanics methods. An anal-  
ogous approach based on local damage evolution was also taken by Amitrano et al. (1999), who  
110 combined

- a linear-elastic constitutive ~~relationship for a continuum~~ law for a continuous solid,
- a local Mohr-Coulomb criterion for brittle failure,
- an isotropic progressive damage mechanism for the elastic modulus described by a non-  
dimensional scalar damage parameter, allowing for the redistribution of the stress from over-  
115 critical to sub-critical areas of the material, for the triggering of avalanches of damaging events  
and the for propagation of faults.

This rheological framework, named Elasto-Brittle (EB), was recently developed in the context of  
the Arctic ice pack by Girard et al. (2011) to explicitly introduce brittle mechanics concepts in  
continuum sea ice models. First implementations of this rheology into short (3-days), no-advection,  
120 stand-alone simulations of the Arctic, but using realistic wind forcing from reanalyses, showed that  
the EB model is able to reproduce the strong localization and the anisotropy of damage within sea  
ice and agrees very well with the deformation fields estimated from the RADARSAT Geophysical  
Processor System (RGPS) data (Girard et al., 2011).

In the context of longer-term simulations of ice conditions and coupling to an ocean component,  
125 a suitable sea ice model however needs to represent not only the small deformations associated with  
the fracturing of the pack, but also the permanent deformations occurring once it is ~~fragmented and  
undamaged~~ fractured and fragmented. When ice floes move relative to each other along open leads,  
~~as~~ these much larger deformations set the advective processes and overall drift pattern of the ice  
cover.

130 This last point is an important and intrinsic limitation of the EB framework, since the linear-elastic  
constitutive law does not allow solving for the elastic (reversible) and permanent deformations ~~of the  
simulated material separately~~—

separately. Hence to estimate the ~~material's velocity~~ velocity of the simulated material, assump-  
tions about the amount of reversible versus irreversible deformation need to be made in the EB  
135 model. The partitioning is bounded by two limit cases. (1) If a loading stress is applied to the dam-  
aged material (see Fig. 1b, dashed blue loading path) and all of the resulting deformation is assumed  
elastic, the material goes back to its initial position if unloaded and its velocity is zero (red dashed  
unloading path). This assumption was made in the no-advection simulations of Girard et al. (2011).  
(2) Alternatively, if all of the resulting deformation is considered permanent, the material keeps its  
140 final position if unloaded (Fig. 1b, purple dashed unloading path) and the velocity is trivially esti-  
mated as the ratio of the total deformation and ~~of~~ the time associated with the loading. In the case  
of sea ice, the second assumption might be justified by the fact that elastic deformations within an  
undamaged pack are small compared to the permanent deformations associated with the opening,  
closing, and shearing along leads. Considering the maximum in-situ values of shear stress of  $10^5$   
145 Pa reported by Weiss et al. (2007) and an undamaged elastic modulus between  $1.0$  and  $10.0 \cdot 10^9$   
Pa (Timco and Weeks, 2010), upper bound values for shear strains in a one meter thick elastic ice  
pack would be on the order of  $10^{-5}$ . On daily time scales, these are at the lower bound of RGPS  
deformation rate estimates (between  $10^{-4}$  and  $10^0 \text{ day}^{-1}$ , for Marsan et al. (2004); Girard et al.  
(2009)), suggesting a dominant contribution of irreversible deformations. This second assumption  
150 is taken in the recently developed neXtSIM sea ice model, which is based on the EB rheology and  
does represent advective processes over the Arctic (Bouillon and Rampal, 2015). However, in this  
all-permanent deformations limit, internal stresses are immediately dissipated, hence the memory of  
the stresses associated with elastic deformations is erased whenever the applied loading is removed  
or reset. Without carrying the history of previous stresses, the model cannot exhibit the intermittency  
155 intrinsic to the mechanical behaviour of sea ice, ~~i.e., that is, the part of the intermittency that is~~ not  
directly inherited from the wind forcing (Rampal et al., 2009). In order to estimate adequate drift  
velocities, a suitable rheological model must therefore have the ~~capacity~~ capability to distinguish  
between reversible and irreversible deformations.

The goal of this work is to develop such a model ~~allowing that allows~~ a passage between the  
160 small/elastic and large/permanent deformations and with the capability of damage mechanics models

to reproduce the observed space and time scaling properties of sea ice deformation. Our approach consists in introducing a viscous relaxation term into the linear-elastic constitutive law of the original EB framework. The new constitutive ~~relationship-law~~ takes the form of the Maxwell viscoelastic model. The all-important difference with respect to the Maxwell framework however is that the  
165 viscosity associated with the stress dissipation term is not meant to represent the viscoplastic creep of bulk ice (Duval et al., 1983), but instead is an "apparent" viscosity that depends on the local level of damage and concentration of the ice cover. As the elastic modulus, this mechanical parameter is coupled to the progressive damage mechanism through a scalar variable  $d$  representing the time and space-evolving level of damage of the ice pack. The coupling is designed so that stresses induce  
170 elastic strains over undamaged portions of the ice and are dissipated through permanent deformations where the pack is highly fractured.

The use of a viscoelastic rheology and apparent viscosity in the case of sea ice can be supported again by the similarity between the mechanical behaviour of the ice pack and that of the Earth crust and by the existence of similar approaches to model lithospheric faulting. Active faults in the Earth  
175 crust have been known to deform in two distinct ways: either abruptly, causing earthquakes, or in an transient, aseismic manner (Scholz, 2002; Gratier et al., 2014; Cakir et al., 2012; Cetin et al., 2014). Similar to sea ice, co-seismic fracturing activates aseismic creep, leading to deformations that can be much larger than that associated with the fracturing itself and to the relaxation of a significant amount of elastic strain (Cakir et al., 2012; Cetin et al., 2014). A further justification of the introduction of  
180 such pseudo-viscosity comes from the rheology of granular media. As sea ice along leads (see Fig. 3), rocks along active faults are highly fragmented. Sheared granular media flow in a viscous manner when inertial effects can be neglected (Jop et al., 2006) with an apparent viscosity diverging as the packing fraction approaches the close-packed limit (Aranson and Tsimring, 2006). This last point will justify the dependence of our apparent viscosity on sea ice concentration.

185 Viscous-elastic rheological models ~~using apparent viscosities combined with damage mechanics~~ have already been used to model the deformation ~~of rock-like materials and failure of glacier ice~~ (e.g., Keller and Hutter, 2014), particularly in the context of glacier crevassing (Pralong and Funk, 2005) and ice sheet calving (Borstad et al., 2012; Krug et al., 2014). However, the time scales involved in damage and deformation are widely different between the sea ice cover and glaciers and the processes at play are of fundamentally different nature : sea ice deforms "rapidly" under the action of the wind and ocean drags, in the brittle regime, while glaciers deform slowly, through viscoplastic deformation of bulk ice. In viscoelastic models for glaciers and ice sheets, the viscosity is therefore the dynamical viscosity associated with the true creep of polycrystalline ice. Besides, in such models damage impacts the viscous flow through the concept of effective stress.

195 In comparison, viscous-elastic models developed for lithospheric faulting somewhat share more similarities with the approach presented here for sea ice, especially with respect to the use of an apparent viscosity. Lyakhovsky et al. (1997) for instance built a viscoelastic damage rheology model

with the intent of representing the different stages of geological faulting, from subcritical crack growth to increasing crack concentration and material degradation, macroscopic brittle failure, post failure deformation and healing. However, the evolution of damage in their model was derived from energy conservation principles rather than from a brittle failure criterion and was coupled to the elastic modulus only. ~~successfully simulated strain localization during lithospheric extension using an elasto-visco-plastic model together with an ad hoc viscosity. As their work was concerned with the ductile rather than the brittle deformation regime, strain softening in their model did not involve a progressive damage mechanism but instead was achieved by coupling the viscosity to the accumulated strain and the elastic modulus of the material was kept constant.~~ Hamiel et al. (2004) modified ~~the coupled linear elasticity and progressive damage rheological framework of this rheological framework~~ with a non-linear damage-elastic moduli relation and by adding a damage-dependent Maxwell-like viscous term to account for the gradual accumulation of irreversible strain observed in typical rock mechanics experiments. The addition of this term had however a fundamentally different purpose than in the present approach in that it was intended for the representation of the small pre-macroscopic brittle failure deformations, not to bridge between small and large deformations.

To our knowledge, it is ~~therefore~~ the first time a viscoelastic Maxwell constitutive law is coupled to a progressive damage (and healing) mechanism through *both* the elastic modulus and an apparent viscosity with the intent of reproducing the small deformation associated with brittle fracturing and the large, permanent post-fracture deformation of geomaterials. It is certainly the first time such a rheological model has been adapted for sea ice modelling.

The paper is structured as follow: the Maxwell-EB rheological framework is described in section 4. A dynamical Maxwell-EB sea ice model is presented in section 5 along with its adimensional version and a discussion of the important non-dimensional numbers involved in the model. The numerical scheme employed in the case of small-deformation experiments is presented and idealized model simulations are described in section 6. In section 7, these simulations are analyzed and discussed on the basis of the macroscopic behaviour and convergence properties of the model and of the heterogeneity, anisotropy and intermittency of the simulated deformation. Conclusions are summarized in section 8.

## 4 The Maxwell-EB model

### 4.1 Constitutive ~~relationship~~law

~~The Maxwell rheology describes the~~ In 1867, James Clerk Maxwell presented a linear model to describe the macroscopic behaviour of a continuum material ~~exhibiting, typically an incompressible fluid, that exhibits~~ both elastic and viscous properties ~~and in small deformations~~ (Maxwell, 1867).

This linear model combines a Newtonian viscous fluid-like damper and a linear elastic term, typically represented an elastic term and is represented schematically in one dimension by a spring and dashpot connected in series (see Fig. 1a). Considering the material, typically an incompressible fluid, as being isotropic at the elementary scale for both elastic and viscous properties, the Maxwell constitutive relationship law reads

$$\frac{1}{G} \frac{D\tau}{Dt} + \frac{1}{\eta} \tau = 2\dot{\epsilon} \quad (3)$$

with  $\tau$ , the deviatoric part of the Cauchy stress tensor,  $G$  and  $\eta$  the (shear) elastic modulus and viscosity of the material associated to the spring and dashpot components respectively, and  $\dot{\epsilon}$  the strain rate tensor, defined in terms of the velocity  $\mathbf{u}$ . The objective derivative of the stress tensor is given by

$$\frac{D\tau}{Dt} = \frac{\partial \tau}{\partial t} + (\mathbf{u} \cdot \nabla) \tau + \beta_a (\nabla \mathbf{u}, \tau)$$

with  $\beta_a (\nabla \mathbf{u}, \tau) = \tau W(\mathbf{u}) - W(\mathbf{u}) \tau - a (\tau D(\mathbf{u}) + D(\mathbf{u}) \tau)$ ,  $D(\mathbf{u}) = \frac{\nabla \mathbf{u} + \nabla \mathbf{u}^T}{2}$  and  $W(\mathbf{u}) = \frac{\nabla \mathbf{u}^T - \nabla \mathbf{u}}{2}$  the symmetric and anti-symmetric parts of the velocity gradient and  $a = 0, 1$  or  $-1$  if using the Jaumann, upper convected or lower convected objective derivative.

When a stress  $\tau$  is applied to the Maxwell system, the resulting deformation  $\epsilon_{total}$  is split between two components: the instantaneous, reversible, deformation of the spring,  $\epsilon_E$ , and the permanent deformation of the dashpot,  $\epsilon_\eta$ , increasing linearly in time (see Fig. 1a). For a given total deformation applied to the system, the rate of dissipation of the associated stress through the permanent deformation of the dashpot is determined by the ratio,  $\frac{\eta}{G}$ , of the viscosity of the dashpot and of the (shear) elastic modulus of the spring,  $G$ . This ratio can be interpreted as a characteristic memory time for elastic deformations : as it decreases, the material loses its capacity to retain the memory of recoverable deformations.

Here we apply the idea of stress dissipation to a 2- or 3-dimensional, compressible, elastic continuum solid and formulate the following constitutive equation by adding a Maxwell-like viscous damper term to the linear elasticity (i.e., Hooke's law) constitutive relationship :

$$\frac{1}{E} \frac{\partial \sigma}{\partial t} + \frac{1}{\eta} \sigma = \mathbf{K} : \dot{\epsilon}(\mathbf{u}) \quad (4)$$

where  $\sigma$  is the total Cauchy stress tensor,  $E$  is the elastic (or Young) modulus and  $\mathbf{K}$  is the (adimensional) is the strain rate tensor, here equivalent to the rate of strain tensor and given by  $D(\mathbf{u}) = \frac{\nabla \mathbf{u} + \nabla \mathbf{u}^T}{2}$  with the velocity  $\mathbf{u}$ . The (dimensionless) elastic stiffness matrix, which tensor  $\mathbf{K}$  is defined in terms of the Poisson ratio  $\nu$  writes  $\mathbf{K} = \frac{\nu}{(1+\nu)(1-2\nu)} \mathbf{I} \otimes \mathbf{I} + \frac{2}{2(1+\nu)} \mathbf{I}$ , the Poisson's ratio, such that for all 3-dimensional symmetric tensor  $\epsilon = \epsilon_{ij} \forall i, j: 1 \leq i, j \leq 3$ ,  $(\mathbf{K} : \epsilon)_{ij} = \frac{\nu}{(1+\nu)(1-2\nu)} \text{tr}(\epsilon) \delta_{ij} + \frac{2}{2(1+\nu)} \epsilon_{ij}$ . In the case of large deformations, the material derivative of the Cauchy stress tensor  $\sigma$  takes the form



of the objective Gordon-Schowalter derivative (Saramito, 2016)

$$\frac{D\sigma}{Dt} = \frac{\partial\sigma}{\partial t} + (\mathbf{u} \cdot \nabla)\sigma + \beta_a(\nabla\mathbf{u}, \sigma) \quad (5)$$

265 where the additional term  $\beta_a$  accounts for the effects of rotation and deformation on the evolution of the stress tensor and expresses as

$$\beta_a(\nabla\mathbf{u}, \sigma) = \sigma W(\mathbf{u}) - W(\mathbf{u})\sigma - a \left( \sigma D(\mathbf{u}) + D(\mathbf{u})\sigma \right)$$

with ~~I the second rank identity tensor~~  $D(\mathbf{u})$  the symmetric and ~~I the symmetric~~  $W(\mathbf{u}) = \frac{\nabla\mathbf{u} - \nabla\mathbf{u}^T}{2}$  the anti-symmetric part of the ~~fourth rank identity tensor~~ velocity gradient. In this rheological frame-  
 270 work, the mechanical parameter  $\eta$  is *not* the true dynamic viscosity of the material but rather is an "apparent" viscosity. The related relaxation time,  $\lambda = \frac{\eta}{E}$ , characterizing the rate at which internal stresses dissipate into permanent deformations, is assumed equal for both the volumetric and deviatoric components of the deformation of the compressible material.

## 4.2 Damage criterion

275 In agreement with in-situ stress measurements (Weiss et al., 2007), and as in the original EB model, the damage criterion in the Maxwell-EB rheology is based on the Mohr-Coulomb (MC) theory of fracture. In terms of the principal ~~stress components~~ stresses  $\sigma_1$  and  $\sigma_2$ , and using the rock mechanics convention that compressive stresses are positive, the MC criterion reads

$$\sigma_1 = q\sigma_2 + \sigma_c \quad (6)$$

280 (or  $\sigma_2 = q\sigma_1 + \sigma_c$ , by symmetry of the criterion along the ~~the~~  $\sigma_1 = \sigma_2$  axis - see Fig. 2). The slope of the envelope in the principal stresses plane,  $q$ , is expressed in terms of the internal friction coefficient  $\mu$  as

$$q = \left[ (\mu^2 + 1)^{1/2} + \mu \right]^2. \quad (7)$$

The intercept  $\sigma_c$  of the MC criterion with the  $\sigma_1$  axes (see Fig. 2), interpreted as the uniaxial (un-  
 285 confined) compressive strength, is given by

$$\sigma_c = \frac{2C}{\left[ (\mu^2 + 1)^{1/2} - \mu \right]}. \quad (8)$$

with the cohesion  $C$  setting the local resistance of the material to pure shear. Disorder is introduced in the damage criterion through a noise in the spatial distribution of  $C$ . This noise represents the ~~material's natural heterogeneity that causes progressive failure behaviour~~ natural heterogeneity of  
 290 a real material associated with various structural defects serving as stress concentrators and which causes the progressive failure of the material even under homogeneous forcing conditions ~~and is~~

~~associated with structural defects at the sub-grid scale, thermal cracks in sea ice for instance, serving as stress concentrators. No correlation length is associated to these heterogeneities, hence their spatial scale corresponds to the~~ (e.g., Herrmann and Roux, 1990; Amitrano et al., 1999; Tang, 1997).

295 ~~In the case of the ice pack, heterogeneities arise for instance in the form of thermal cracks or brine pockets~~ (Schulson, 2004; Schulson and Duval, 2009), ~~the length scale of which is much smaller than the typical~~ spatial resolution of ~~the model, models~~ ( $> 1$  km). Therefore, ~~heterogeneity in the Maxwell-EB model is introduced at the smallest resolved scale, that is the mesh element size  $\Delta x$ ; and, by drawing randomly~~ the value of  $C$  over each ~~model element is drawn randomly~~ element  
 300 from a uniform distribution of values spanning estimates from in-situ stress measurements in Arctic sea ice (Weiss et al., 2007). The internal friction coefficient  $\mu$  is set to 0.7, a value seemingly scale-independent and consistent with laboratory experiments on Coulombic shear faults in fresh ice (Schulson et al., 2006b; Fortt and Schulson, 2007; Weiss and Schulson, 2009) and also common for geomaterials (Byerlee, 1978; Jaeger and Cook, 1979).

305 For metals and rocks, the MC theory was shown to be defective in the case of tension (Paul, 1961), as the mechanism of tensile failure is intrinsically different to that of compressive failure and, in general, does not involve friction. In the case of  $\sigma_1, \sigma_2 < 0$ , fracture occurs whenever  $\sigma_1$  or  $\sigma_2$  reaches a critical value. However, in-situ stress measurements in Arctic sea ice have revealed that pure tensile failure does not significantly modify the Coulombic-like failure envelope of pack ice and  
 310 that Coulomb branches well describe this envelope even under large tensile stresses, up to at least  $\sigma_N \sim 50$  kPa (Weiss et al., 2007). Here, we therefore extend the Mohr-Coulomb criterion to tensile stresses and for practical reasons, set the critical value to the ultimate tensile stress  $\sigma_t$ , defined as the intersection of the Mohr-Coulomb criterion with the  $\sigma_2$  axis (Paul, 1961), as shown on Fig. 2. The tensile strength cutoff therefore takes the form:

$$315 \quad \sigma_1 < 0; \quad \sigma_2 = \sigma_t, \quad (9)$$

where

$$\sigma_t = -\frac{\sigma_c}{q} = -2C \left[ (\mu^2 + 1)^{1/2} + \mu \right]. \quad (10)$$

This gives a ratio of the ultimate tensile stress and uniaxial compressive stress of  $\frac{\sigma_t}{\sigma_c} \approx 0.27$ , which might slightly overestimate the tensile strength for sea ice as measured on the field (Weiss et al.,  
 320 2007) and in the lab (Schulson, 2006a) ( $\sigma_t \approx 0.2\sigma_c$ ). However, as such large values of tensile strength are rarely obtained in the Maxwell-EB model simulations, this choice does not significantly affect our results.

No truncation to the MC criterion is used to close the envelope towards biaxial compression (i.e., beyond  $\sigma_c$ ) as instances of large biaxial compressive stresses are seldom encountered in Arctic sea  
 325 ice (Weiss et al., 2007). Besides, imposing a truncation was shown to have little impact on the simulation results. The damage criterion combining the MC envelope and the tensile strength cutoff

is represented in Fig. 2 in the principal stresses plane and has the same shape as deduced by Coon et al. (2007) from measurements in undamaged pack ice.

### 4.3 Progressive damage mechanism and healing

330 The Maxwell-EB rheology differs from the standard Maxwell rheology in that the mechanical parameters  $E$ ,  $\eta$  and  $\lambda$  are not constant but all coupled to the spatially and temporally evolving level of damage of the material, which controls its local degradation and re-increase in strength. Consistent with previous damage rheological frameworks, the level of damage is represented by a non-dimensional, scalar parameter ~~evolving between~~. The level of damage is equal to 1 (undamaged  
335 )and for an undamaged material and approaches the value of 0 (in the case of a "completely damaged" material). This variable is interpreted as a measure of sub-grid cell defects ~~or crack density~~ and is allowed to evolve through two competing mechanisms : damaging and healing. On the one hand, damaging represents fracturing and the opening of faults, or "leads" in the case of sea ice, occurring when and where the internal stress exceeds the mechanical resistance of the material and  
340 which leads to its weakening. Healing on the other hand represents the reconsolidating and strengthening of the damaged material through sintering or, in the case of sea ice, refreezing within open leads. Although this mechanism also contributes to the increase in elastic stiffness ( $E \times h$ , with  $h$  the ice thickness) and effective apparent viscosity ( $\eta \times h$ ) of the ice, healing is distinguished from pure thermodynamic growth or dynamically-driven thickness redistribution (e.g., Rothrock, 1975)  
345 in that it applies only where and when the material has been damaged. It therefore allows  $d$ ,  $E$  and  $\eta$  to re-increase at most to their undamaged value;  $d^0 = 1$ ,  $E^0$  and  $\eta^0$  respectively. Because the two processes operate simultaneously within the simulated material, an evolution equation for  $d$  needs to include both mechanisms. In the following damaging and healing are first treated separately and then combined in a single equation for  $d$ .

#### 350 4.3.1 Damaging

Contrary to typical sea ice modelling frameworks, no plastic (i.e., normal) flow rule is prescribed when the damage criterion is reached in the Maxwell-EB model. Instead, when the stress locally exceeds the critical stress, the elastic modulus is allowed to drop, leading to local strain softening (e.g., Amitrano et al., 1999; Cowie et al., 1993; Tang, 1997; Hamiel et al., 2004, and others). Because of  
355 the long-range interactions within the elastic medium, local drops in  $E$  imply a stress redistribution that can in turn induce damaging of neighbouring elements. By this process, "avalanches" of damaging events can occur and damage can propagate within the material over long distances (Amitrano et al., 1999; Girard et al., 2010). As the elastic perturbation generated by such events is anisotropic (Eshelby, 1957), this propagation mechanism naturally leads to the emergence of both spatial het-

360 erogeneity and anisotropy in the stress and strain fields, i.e., to the formation of linear-like faults (see section 7).

In the Maxwell-EB model, the *change* in level of damage corresponding to a local damage event is determined as a function of the distance of the damaged model element to the yield criterion. Three important assumptions are made when calculating this distance, denoted  $d_{crit}$ . The first is that the deformation of each model element is conserved during a damaging event, i.e., at initiation, damage  
 365 modifies only the local state of stress, not strains. The second is that, for a sufficiently small model time step  $\Delta t$ , i.e. very small compared to the viscous relaxation time  $\lambda$  (see section 5.1), a negligible part of the stress is dissipated into viscous deformation. A third constraint is based on the fact that stresses outside the failure envelope are not physical because brittle failure would occur before the  
 370 material could support them. Hence we consider that after being damaged, an element has its state of stress lying just on the failure envelope. With these assumptions, the following equality holds for each damaged element:

$$\varepsilon' = \varepsilon \longleftrightarrow \frac{\mathbf{K}^{-1}\sigma'}{E \times d_{crit}} = \frac{\mathbf{K}^{-1}\sigma}{E}, \quad (11)$$

where the

375 (12)

where  $\varepsilon$  is the strain tensor and the superscript  $'$  denotes the post-damage state of deformation and stress. In terms of the principal ~~stress components~~ stresses, the change in level of damage of a given element is given by

$$d_{crit} = \frac{\sigma'_1}{\sigma_1} = \frac{\sigma'_2}{\sigma_2}, \quad (13)$$

380 which implies that as the level of damage varies, all stress components vary in the same proportions. Hence the state of stress  $\sigma'$  after each damaging event is given by the intersection of the failure envelope and of the line connecting the pre-damage state of stress  $(\sigma_1, \sigma_2)$  with the origin, in the principal stress plane (see Fig. 2). Two cases must be distinguished when calculating  $\sigma'$ , depending on which of the Mohr-Coulomb or tensile criterion has been exceeded. Combining the two,  $d_{crit}$  is  
 385 evaluated simultaneously over all mesh elements of the model domain as:

$$d_{crit} = \min \left[ 1, \frac{\sigma_t}{\sigma_2}, \frac{\sigma_c}{\sigma_1 - q\sigma_2} \right]. \quad (14)$$

Following progressive damage models, the level of damage of a given element in the Maxwell-EB model at any given time is determined by both its instantaneous distance to the damage criterion  $d_{crit}$ , i.e., its current state of stress, and its previous damage level. This implies that the variable  $d$  carries the entire history of damage of model elements and, if discretizing time as  $t_n = n\Delta t$ ,  $n \geq 0$ ,  
 390 translates into the discrete recursive equation

$$d^{n+1} = d_{crit}^{n+1} d^n, \quad 0 < d^0 \leq 1. \quad (15)$$

A continuous evolution equation for  $d$  can be obtained by considering that the time characterizing the redistribution of stress between model elements is intrinsically tied to the speed of propagation of elastic waves,  $c$ , in the material, which carry the damage information. Using a Backward explicit scheme of order 1, and setting the model time step to  $\Delta t = t_d$  with  $t_d = \frac{\Delta x}{c}$ , the exact time of propagation of an elastic wave with speed  $c$  over a distance  $\Delta x$ , the following equation arises:

$$\frac{Dd}{Dt} = \frac{d_{crit} - 1}{t_d} d. \quad (16)$$

### 4.3.2 Healing

By healing, the simulated material is allowed to regain some strength. The characteristic time for this process is designated in the following by  $t_h$ . It corresponds to the time required for a completely damaged element ( $d = 0$ ) to recover its initial stiffness ( $d = 1$ ), which in a dynamic-thermodynamic sea ice model would depend on the local difference between the temperature of the air near the surface of the ice and the freezing point of seawater below. Healing schemes of varying level of complexity could be used in the Maxwell-EB model. One possibility is the one employed in the EB sea ice model of Girard et al. (2010), which follows parameterizations of the vertical growth of sea ice (Maykut, 1986). An underlying assumption is that the rate of healing is inversely proportional to the level of damaging of the ice. However as there is no physical evidence for this assumption, in the following, uncoupled, implementation of the Maxwell-EB model we use an even simpler parameterization that implies a constant healing rate,  $\frac{1}{t_h}$ :

$$\frac{Dd}{Dt} = \frac{1}{t_h}, \quad 0 \leq d \leq 1. \quad (17)$$

Combining both the damaging and healing mechanisms (Eq. 14, 16 and 17), the complete evolution equation for  $d$  is

$$\frac{\partial d}{\partial t} + (\mathbf{u} \cdot \nabla) d = \left( \min \left[ 1, \frac{\sigma_t}{\sigma_2}, \frac{\sigma_c}{\sigma_1 - q\sigma_2} \right] - 1 \right) \frac{1}{t_d} d + \frac{1}{t_h}, \quad 0 < d \leq 1, \quad (18)$$

Although the two processes apply simultaneously on the level of damage in the model, they are inherently distinct. On the one hand, damaging is a discrete threshold mechanism applying only ~~where and when~~ when and where the state of stress becomes overcritical. As mentioned in sections 4.2 and 4.3.1, the characteristic time for this process,  $t_d$ , is tied to the speed of propagation of (shear) elastic waves and to the model's spatial resolution. In the case of an heterogeneous ice pack, an average value for  $c$  is on the order of 500 m/s (Marsan et al., 2011). For spatial resolutions between that of current global climate and high resolution regional sea ice models ( ~~$\Delta x = 1$~~   $\Delta x \approx 1$  to 100 km), the characteristic time for ~~damaging~~ damage evolution,  $t_d$  therefore varies between  ~~$\Theta(1)$~~  and  $\Theta(10^2)$  ~~sa few seconds to a few hundreds of seconds~~. Healing on the other hand is a continuous

process acting on all model elements, independently of the local distance to the damage criteria.

420 Studies on the refreezing within leads in sea ice showed that the time for 1 meter of ice to grow within an opening of 10 cm under atmospheric temperatures of  $T_a = -15^\circ C$  is of  ~~$\Theta(100)$  hours or  $\Theta(10^5)$  seconds~~ a hundred hours (between  $10^5$  and  $10^6$  seconds, Petrich et al., 2007). The orders of magnitude of difference between  $t_h$  and  $t_d$  therefore imply that the two processes are intrinsically decoupled in the case of the ice pack.

#### 425 4.3.3 Coupling $d$ with $E$ and $\eta$

The coupling between the Maxwell-EB constitutive ~~relationship~~ law and the progressive damage mechanism constitutes one of the main features of this new modelling framework. It is defined such that:

- deformations within an undamaged medium are small and reversible, i.e., strictly elastic.  
430 Hence undamaged portions of the simulated material have a maximum elastic modulus  $E^0$  and a very large apparent viscosity  $\eta^0$ . In this case, the viscous term in (4) is negligible and a linear-elastic constitutive ~~relationship~~ law is recovered (Fig. 3, right panel),
- deformations can accumulate over highly damaged areas of the material to become arbitrarily large. These deformations are permanent and dissipate most of the ~~the~~ stress applied to the  
435 material within a short relaxation time. Hence the elastic modulus, viscosity and relaxation time drop locally over damaged areas. In the limit of a completely damaged material, elastic interactions are hindered and deformations are strictly irreversible (Fig. 3, left panel). In this case,  $\lambda \rightarrow t_d$  and a soft elastic-plastic behaviour is recovered in which the memory of the elastic stresses is totally lost (narrow-dashed blue line on Fig. 1).
- 440 – as damaged areas are allowed to heal,  $E$ ,  $\eta$  and  $\lambda$  all re-increase, up to their initial undamaged values.

Different functions could be used to express the dependence of  $E$ ,  $\eta$  and  $\lambda$  on  $d$  that meet these criteria. In the absence of physical evidences for a higher level of complexity, and consistent with the relationship between the elastic modulus and crack density used in damage models of rocks (Agnon  
445 and Lyakhovsky, 1995; Amitrano et al., 1999; Schapery, 1999), we use the simplest parameterization and set

$$E(t) = E^0 d(t) \tag{19}$$

$$\eta(t) = \eta^0 d(t)^\alpha; \tag{20}$$

~~such that~~

450 ,  $\lambda(t) = \lambda^0 d(t)^\beta$  (21)

with  $0 < d(t=0) \leq 1$  such that

$$\lambda(t) = \frac{\eta^0}{E^0} d(t)^{\alpha-1} \quad (22)$$

with  $\alpha$  a constant greater than 1 introduced to fulfil the constraint that the relaxation time for the stress also decreases with increasing damage and re-increases with healing, as the material respectively loses and recovers the memory of reversible deformations. Using this formulation, both  $\eta$  and  $E$  are entirely defined by their initial value, a constant, and by depend only on their undamaged value and on the level of damage variable  $d$ . However, the constitutive equation becomes undefined in the limit of  $d \rightarrow 0$ . This problem can be handled by imposing a fixed minimum value  $d_{min} > 0$  for the level of damage. Alternatively, a cutoff  $\eta_{min} \ll \eta^0$  on the value of the apparent viscosity can be introduced and the expression for  $\eta(d)$  modified as-

$$\eta = (\eta^0 - \eta_{min})d^\alpha + \eta_{min} = \eta^0 \text{ for } d = 1, \eta_{min} \text{ for } d = 0.$$

Substituting for  $\eta$  in the expression for the relaxation time, the elastic modulus then becomes-

$$E = \frac{\eta^0 - \eta_{min}}{\eta^0} E^0 d + \frac{\eta_{min}}{\eta^0} \frac{1}{d^{\alpha-1}} E^0,$$

such that  $E \approx E^0$  for  $d = 1$ ,  $E$  decreases with  $d$  until a minimum at  $d(E_{min}) = \left[ \frac{\eta_{min}}{\eta^0 - \eta_{min}} (\alpha - 1) \right]^{\frac{1}{\alpha}}$  and  $E \rightarrow \infty$  for  $d \rightarrow 0$ . Using such a cutoff on  $\eta$ , the elastic term in the Maxwell-EB constitutive equation therefore vanishes in the limit of a "totally" damaged material and the rate of viscous dissipation is then set by the minimum viscosity  $\eta_{min}$ . It is important to note that this limit has no physical significance in the context of a progressive damage model for a continuum solid and is rather introduced to insure mathematical consistency while retaining a continuous function for the level of damage. In the following implementation of the model, we take this approach instead of imposing a minimum value of  $d$ , but it had really no impact on our results since in the simulations presented here  $d > d(E_{min})$  at all times.

## 5 A Maxwell-EB sea ice model

In this section, the Maxwell-EB rheology is implemented in the context of sea ice modelling. As in regional and global sea ice models, the ice cover is considered as a 2-dimensional plate due to its very large aspect ratio and a-plane stresses are assumed. A constant healing rate is assumed used. In this case, the complete dynamical model is given by the following system of equations:

1. The momentum equation:

$$\rho h \left[ \frac{\partial \mathbf{u}}{\partial t} + (\mathbf{u} \cdot \nabla) \mathbf{u} \right] = \mathbf{F}_{\text{ext}} + \nabla \cdot (h\sigma), \quad (23)$$

with  $\mathbf{u}$  the velocity,  $h$  the thickness and  $\rho$  the density of sea ice.  $F_{ext}$  assimilates represents all external forces on the sea ice cover, which in regional and global sea ice models are typically the air and ocean drags and the forces associated with the Coriolis acceleration and gradients in sea surface height. We assume the internal stress to be homogeneously distributed within the depth over the thickness  $h$  and following and, we write the momentum equation in terms of the internal stress rather than the vertically integrated stress tensor more commonly used in the sea ice modelling community. This approach was also taken in the Elasto-Brittle model of Bouillon and Rampal (NeXtSIM 2015), as it allows a direct comparison between the local state of stress and the critical stress ( $\sigma_t$  or  $\sigma_c$  here) when estimating the distance to the damage criterion.

2. Conservation equations for the ice concentration  $A$  (ice-covered surface per unit area) and ice thickness  $h$ :

$$\frac{\partial h}{\partial t} + \nabla \cdot (h\mathbf{u}) = S_h, \quad h \geq 0 \quad (24)$$

$$\frac{\partial A}{\partial t} + \nabla \cdot (A\mathbf{u}) = S_A, \quad 0 \leq A \leq 1. \quad (25)$$

where  $S_h$  and  $S_A$  represents thermodynamic source and diffusion terms and. An assumption behind these conservation equations is that elastic compressibility effects are assumed negligible relative to dynamic variations of the ice volume in the conservation of the mass of the sea ice cover.

3. The constitutive relationship law (4) with

$$E = f_1(E^0, \eta^0, \eta_{min}, d) \exp[-c^*(1-A)d] \exp[-c^*(1-A)], \quad (26)$$

$$\eta = f_2(\eta^0, \eta_{min}, d) \exp[-c^*(1-A)d] \exp[-c^*(1-A)], \quad (27)$$

where  $f_1$  and  $f_2$  represent the functional dependance dependence on the level of damage of the ice  $d$ , given by (19) and (21) respectively. The exponential function of the ice concentration allows the internal stress term to be maximal when  $A=100\%$   $A=1$  and to decrease rapidly when leads open and  $A$  drops. It is of the same form as that used for the pressure term ( $P$ , or ice strength in compression) in the VP rheology of Hibler (1979). Here the non-dimensional parameter  $e^*c^*$  characterizing this dependence on the ice concentration has the same (constant) value for both mechanical parameters, but could be set different in a refined parameterization.

4. The equation for the evolution of damage (18) with the damage criterion defined by Eq. (6) and Eq. (9) and  $q$ ,  $\sigma_c$  and  $\sigma_t$  given by (7), (8), (10) in terms of the cohesion variable  $C$  and of the constant internal friction coefficient  $\mu$ .



In the case of "quenched disorder" (i.e., when the field of  $C$  is set at the beginning of a model simulation), an additional equation arises that handles the advection of the field of cohesion with the simulated velocity field. Table 1 lists all model variables and parameters.

## 510 5.1 Characteristic numbers and times

Neglecting all thermodynamic effects and variations in ice thickness and concentration (considering  $h = 1$  and  $A = 100\%$ ) as well as external forcings and adimensionalizing with respect to the ice velocity  $U$ , the horizontal extent of the model domain  $L$ , ~~the thickness of the ice  $H$~~  and the undamaged elastic modulus  $E^0$ , the dynamical system of equations ~~read~~ reads

$$\text{Ca}^0 \frac{D\tilde{\mathbf{u}}}{D\tilde{t}} = \tilde{\nabla} \cdot \tilde{\sigma} \quad (28)$$

$$\text{We}^0 d^{\alpha-1} \frac{D\tilde{\sigma}}{D\tilde{t}} + \tilde{\sigma} = \text{We}^0 d^{\alpha'} \mathbf{K}(\nu) : \tilde{\varepsilon}(\tilde{\mathbf{u}}) \quad (29)$$

$$\frac{Dd}{D\tilde{t}} = \left( \min \left[ 1, \Sigma_t \frac{1}{\tilde{\sigma}_2}, \Sigma_c \frac{1}{\tilde{\sigma}_1 - q\tilde{\sigma}_2} \right] - 1 \right) \frac{1}{T_d} d + \frac{1}{T_h}, \quad 0 < d \leq 1. \quad (30)$$

515 ~~where  $d^{\alpha'}$~~   $= \left[ \left( 1 - \frac{\eta_{min}}{\eta_0} \right) d^{\alpha} + \frac{\eta_{min}}{\eta_0} \right]$  ~~and~~ where the superscript  $'\sim'$  is used for all non-dimensional variables and operators.

In this form, the model involves 8 characteristic numbers and time scales : the (undamaged) Cauchy number,  $\text{We}^0$ , the (undamaged) Weissenberg number,  $\nu$  Poisson's ratio,  $\Sigma_t$  the dimensionless critical tensile stress,  $\Sigma_c$  the dimensionless critical stress with respect to the Mohr-Coulomb  
520 criterion,  $T_d$  the characteristic time for damagingdamage evolution,  $T_h$  the characteristic time for healing and  $\alpha$  the damage constant. In order for the Maxwell-EB model to represent the intended physics, the value of these parameters must evolvelie within a certain rangeof values. In the following we elaborate on the absolute and relative values of those numbers which are the most critical in the context of sea ice modelling.

### 525 5.1.1 $T_d$

As mentioned in the previous section, the (adimensional) characteristic time for the propagation of damage,  $T_d = \frac{t_d}{T}$  with  $T = \frac{L}{U}$ , is determined by the speed of propagation of elastic waves within the simulated material and is strongly tied to the mean spatial resolution of the model, as  $t_d$  should be of  $\Theta(\text{order } \frac{\Delta x}{c})$ . In turn, this time places a strong constraint on the Maxwell-EB model time step.  
530 Setting  $\Delta t < \frac{\Delta x}{c}$  is indeed unphysical, as the time associated to one model iteration would then be too short for the stress to be redistributed from one overcritical element to its direct neighbour. For the model to resolve the propagation of damage, the time step must therefore be  $\geq t_d$ .

No strict upper bound to  $\Delta t$  is imposed by the damage mechanism. OneOn the one hand, choosing  $\Delta t > t_d$  could be interesting in terms of reducing computational costs. Physically, it implies

535 that damage is allowed to propagate beyond the first neighbour barrier and over larger distances within one model time step. On the other hand, increasing  $\Delta t$  with respect to  $t_d$  also implies (1) a decrease in the resolution of damaging, as the model might miss important intermediate damage events that trigger additional interactions between neighbouring elements and (2) larger local drops in the level of damage, inducing large stress perturbations and, potentially, numerical instabilities  
 540 in the model. ~~Sensitivity analyses on the propagation of the damage should therefore be performed when choosing  $\Delta t > t_d$ .~~ The temporal resolution that is optimal in terms of capturing all elastic interactions within the simulated material and ensuring numerical stability is therefore  $\Delta t = t_d$ . In ~~the model experiments~~ all simulations presented in the following, this is the choice we make.

### 5.1.2 $T_h$

545 In order for healing not to offset damaging in the rate of change of  $d$ , the (adimensional) time for healing,  $T_h = \frac{t_h}{T}$ , must be much larger than the (adimensional) time for damage propagation. This separation of scales ensures that elements cannot recover by healing more strength than they have lost by damaging within one time step, ~~as~~. In the case of sea ice for instance, excess healing would effectively entail a net growth ~~of the material, or thickening, of the pack,~~ a process that ~~is not intended by~~  
 550 ~~this parameterization and~~ should instead be accounted for by thermodynamic ~~balance calculations.~~ Considering the balance considerations. However, considering the aforementioned estimates of the speed of elastic waves and of the healing rate of leads ~~aforementioned~~ (see section 4.3), pack ice naturally meets this condition the sea ice cover naturally meets the condition  $T_h \ll T_d$ .

### 5.1.3 $We$

555 The Weissenberg number,  $We$ , defined as the dimensionless product of the viscous relaxation time for the stress and of time  $T = \frac{L}{U}$  characterizing the deformation process:

$$We = \frac{\eta}{E} \frac{U}{L} = \frac{\lambda}{T}, \quad (31)$$

sets the viscous versus elastic character of the flow of a viscoelastic material. In the original Maxwell model,  $We = 0$  represents the limit of zero elastic stresses, while a very large  $We$  characterizes a  
 560 strictly elastic solid. In the Maxwell-EB model, the Weissenberg number evolves according to the level of damage as  $We = We^0 d^{\alpha-1}$  with  $We^0$ , its maximum value.

As viscous dissipation should be insignificant ~~over in~~ undamaged and strictly elastic areas of the material,  $We^0$  should be chosen very large, representing the limit of  $\frac{1}{\eta^0} \rightarrow 0$ . In this case the viscous term in the constitutive ~~relationship law~~ (4) effectively vanishes and a linear elastic rheology  
 565 is recovered. In practice, the value of  $We^0$  is however limited, first, by the machine precision and second, due to a numerical scheme failure known in the field of viscoelastic flow computations as the high Weissenberg number problem (Keunings, 1986; Fattal and Kupferman, 2004, 2005; Saramito,

2014). For large values of  $We$ , numerical instabilities arise in Maxwell-type models due the presence of deformation source terms ( $\beta_d$ ) in the transport equation for the stress tensor (5). With  $We^0$  (or equivalently,  $\lambda^0$ ) too low, simulations can run for a time  $t \sim \lambda^0$  and unphysical viscous dissipation can occur ~~over in~~ undamaged parts of the simulated material. ~~To get round this problem, This issue can be dealt with by multiplying~~ the viscous term in the Maxwell constitutive ~~relationship can be multiplied~~ law by a Heaviside function  $d^*$  that effectively sets  $\frac{1}{\eta}$  to the limit value of 0 when and where  $d \geq d_c$ , with  $d_c$  a chosen threshold value (e.g.,  $d_c = 1$  when using a constant heal rate parameterization) and leaves the constitutive equation unchanged ( $d^* = 1$ ) otherwise. In small-deformation experiments, i.e., run for a time  $t \ll \lambda^0$ , viscous dissipation over undamaged parts of the material is not significant and the inclusion of such a function ~~is~~ unnecessary.

Conversely, where damage becomes important, the viscous relaxation time  $\lambda$  should decrease significantly below the characteristic time for healing to allow for internal stresses to "have time" to dissipate and deformations to become large.

#### 5.1.4 Ca

The dimensionless number that arises when adimensionalizing stresses in the momentum equation with respect to the elastic modulus is the Cauchy number, defined as the ratio of inertial to elastic forces ( $Ca = \frac{\rho U^2}{E}$ ). If inertial forces are comparable to elastic forces and  $Ca \sim 1$ , the effect of the propagation of viscoelastic waves in the material cannot be neglected. ~~Yet, setting  $\Delta t \geq t_d$ , that is  $\Delta t$  at least equal to the period of shear elastic waves, implies that the model does not resolve these waves, but only their consequence of transmitting the damage information within the material. Hence the wave signal cannot be properly filtered out of the model's solution. In order for the wave contribution not to have a significant effect on the simulated deformation and stress fields,  $Ca$  must therefore be  $\ll 1$ .~~ Dimensional analysis indicates that over an undamaged ice pack with velocity ranging between 0.001 and 1 m/s,  $Ca^0$  is in the range  $[10^{-12} - 10^{-6}]$ . Hence inertial effects can be safely neglected. For simulated ice velocities  $U < 1$  m/s, and  $\alpha > 2$ , inertial effects in the Maxwell-EB model remain negligible when damage becomes important.

#### 5.1.5 $\alpha$

The damage parameter  $\alpha$  controls the rate at which the apparent viscosity decreases and the material loses its elastic properties with damaging. As mentioned in previous sections, it should be set greater than 1 in order for the viscous relaxation time to decrease with damaging. The requirements that (1) the viscous relaxation time drops well below the time for healing over highly damaged areas and (2) inertial effects remain negligible for high deformation rates (i.e., large velocities) can also place a constraint on the minimum value of  $\alpha$ . Conversely, for large values of  $\alpha$ , the relaxation time  $\lambda$  becomes very small whatever the damage level (see section 4.3.3). This means that elastic

deformations are almost immediately dissipated after damaging, that is, the model becomes purely elasto-plastic. The sensitivity of the model to the value of this parameter was kept for a separate paper, hence  $\alpha$  is not varied here. For the experiments presented herein section 7, we find that  $\alpha = 4$  allows representing both the brittle behaviour and the relaxation of the internal stress ~~within-in~~ a material with mechanical parameters in the range of the values suitable for sea ice. For  $\alpha$  larger than about 7, memory effects become insignificant and the experiment instead exhibits a stick-slip behaviour with a well-defined characteristic frequency (not shown).

## 6 Numerical scheme and experiments

The objective time derivative for-of the Cauchy stress  $\sigma$  in the Maxwell-EB constitutive ~~relationship~~ law (4) is composed of ~~an-inertial-terma~~ time derivative, an advection term and of a sum of rotation and deformation ( $\beta_a$ ) terms, each of which implies a different level of numerical complexity. In developing the model, our approach is to introduce each of these terms separately in order to evaluate their respective contribution to the simulated mechanical behaviour. On the one hand, introducing the ~~inertial-term-time~~ derivative while neglecting the advection and  $\beta_a$  terms allows retaining a Lagrangian scheme, similar to the original EB model (Girard et al., 2011). Without any remeshing of the domain, the model is then suitable for short-term, small-deformation simulations only. On the other hand, when permanent deformations accumulate over a long time, the advection term is no longer negligible and  $\beta_a$  terms become potentially important.

In the following, we present small-deformation numerical experiments that allow analyzing the mechanical behaviour of the Maxwell-EB model in terms of the statistical and scaling properties of the simulated damage and deformation fields. Performed with a highly idealized configuration for the domain geometry, the applied loading and boundary conditions, these will demonstrate that the main characteristics of sea ice deformation (spatial heterogeneity, anisotropy, intermittency) naturally emerge from the underlying physics and do not need to be implemented in an ad-hoc manner.

The simulations represent the uniaxial compression of a (2-dimensional) rectangular ice plate with dimensions  $\frac{L}{2} \times L$  (see Fig. 4a). Compression is applied by prescribing a constant velocity  $U$  on the upper short edge of the plate with the opposite edge maintained fixed in the direction of the forcing. No confinement is applied on the lateral sides. The velocity  $U$  is set small enough to ensure a low driving rate (i.e., slow compared to time scale of damage propagation, (Cowie et al., 1993)).

In the present implementation, the model is not yet coupled to a thermodynamic component, hence  $S_A = S_h = 0$ . As advection is neglected and simulations are run for a short enough time such that the macroscopic and local deformations within the ice cover remain small ( ~~$\sim 1\%$  of the area of model elements~~ the cumulative deformation is  $\leq 10\%$  of the size of a single model element), dynamics-induced variations (through convergence-divergence) of the ice thickness and concentration are not

accounted for and hence the mechanical parameters  $E$ ,  $\eta$  and  $C$  are not yet coupled to  $h$  or  $A$ . Conservation of mass is therefore not imposed in these small-deformation simulations, equivalent to assuming a uniform, constant thickness (1 m) and ice concentration (100%). ~~In this case, the system of equations reduces to Eq. to with  $\frac{D\tilde{u}}{Dt} = 0$  and the 6 unknowns  $\tilde{u}$  (2 components),  $\tilde{\sigma}$  (3 components) and  $\tilde{d}$ .~~ All simulations are started from an initially undamaged ice cover with uniform elastic modulus and viscosity. Undamaged mechanical parameter values are chosen to represent sea ice on regional to global scales ( $c = 500 \text{ ms}^{-1}$  and  $\nu = 0.3$ ). The undamaged elastic modulus is given by the relation  $E^0 = 2c^2(1 + \nu)\rho$  and the undamaged viscosity  $\eta^0$  is set such that the initial relaxation time  $\lambda^0$  is as large as possible while the maximum Weissenberg number  $We^0$  is small ( $< 1$ ). All model variables and parameters are listed in table 1. Parameter values are not varied in any of the simulations presented here.

The model is made adimensional with respect to the length of the rectangular plate,  $L$ , the prescribed velocity  $U$  on the top boundary, and the undamaged elastic modulus  $E_0$ .

The system of equations is therefore given by Eq. (28) to (30) with  $\frac{D\tilde{u}}{Dt} = 0$  and is solved for the 6 unknowns  $\tilde{u}$  (2 components),  $\tilde{\sigma}$  (3 components) and  $\tilde{d}$ . In all simulations, the time step is set equal to the characteristic time for damage propagation ( $\Delta t = T_d$ ). A semi-implicit scheme is used that linearizes the system, in which the momentum and constitutive equations are first solved simultaneously using a backward Euler scheme of  ~~$\Theta(1)$ -order 1~~ and the value of  $\tilde{d}$  at the previous model time step. The level of damage is updated in a second time using the estimated  $\tilde{u}$  and  $\tilde{\sigma}$  and an explicit scheme of  ~~$\Theta(1)$ -order 1~~. A fixed-point algorithm iterates between these two steps until the residual of the linearized constitutive equation drops below a chosen tolerance, ensuring the convergence of the solution. Finite elements (FE) and variational methods are used to solve the time-discretized problem on a Lagrangian grid within the C++ environment RHEOLEF (Saramito, 2013: <http://cel.archives-ouvertes.fr/cel-00573970>). An unstructured mesh with triangular elements is used and the average spatial resolution is set by choosing the number  $N$  of elements along the short side of the domain.

~~All simulations are started from an initially undamaged ice cover with uniform elastic modulus and viscosity. Undamaged mechanical parameter values are chosen so that to be representative of sea ice on regional to global scales ( $c = 500 \text{ ms}^{-1}$  and  $\nu = 0.3$ ). The undamaged elastic modulus is given by the relation  $E^0 = 2c^2(1 + \nu)\rho$  and the undamaged viscosity  $\eta^0$  is set such that the initial relaxation time  $\lambda^0$  is as large as possible while the maximum Weissenberg number,  $We^0$  is small ( $< 1$ ). All model variables and parameters are listed in table 1. Parameter values are not varied in any of~~ As cumulative deformations are small (see above) the experiments presented here as a sensitivity study is kept for a separate paper. FE spatial discretization is defined based on the initial mesh grid and is not updated in time. All results presented in the following are expressed in terms of adimensional quantities, however for the sake of simplicity we drop the '˜' notation for all variables.

## 7 Results

In this section we analyze the mechanical behaviour of the Maxwell-EB model. In particular, we evaluate its capacity capability to reproduce the main characteristics of sea ice deformation, ~~which are its spatial- its~~ heterogeneity, intermittency and anisotropy, ~~following the methodology developed in previous observational studies of the deformation and drift of the Arctic ice pack.~~

One signature of the strong heterogeneity of sea ice deformation is the emergence of a spatial scaling in the deformation fields over a wide range of scales. Using a coarse-graining procedure, performed a scaling analysis of the deformation of sea ice over the Arctic using the 3-days, 10 km  $\times$  10 km gridded RGPS deformation product. Doing so, they obtained a power-law relationship between the total deformation rate  $\langle \dot{\epsilon}_{tot} \rangle_l$  invariant and the corresponding averaging scale  $l$  of the form

$$\langle \dot{\epsilon}_{tot} \rangle_l \sim l^{-\beta}$$

with a constant exponent  $\beta > 0$ , indicating correlations in the deformation fields over 2 orders of magnitude in  $l$  and an increase in the mean strain rate with decreasing scale of observation, in agreement with a strong spatial localization of the deformation.

This coarse-graining calculation was later extended to ice buoy data which, with a higher temporal resolution than the RGPS data, allowed performing scaling analyses of Arctic sea ice deformation in the temporal dimension as well. Using the dispersion rate of buoys as a proxy for the strain rate, obtained a power-law relationship between the total deformation rate  $\langle \dot{\epsilon}_{tot} \rangle_t$  computed at a chosen space scale and the time scale of observation  $t$

$$\langle \dot{\epsilon}_{tot} \rangle_t \sim t^{-\gamma}$$

with a constant exponent  $\gamma > 0$  over 2 orders of magnitudes in  $t$  (3 hours to 3 months), indicating an increase of strain rates with decreasing temporal scale consistent with an intermittent deformation process. Recently, these temporal and spatial scaling properties have been which have been recently used as benchmarks to validate (or invalidate) sea ice models (e.g., Girard et al., 2009, 2010; Bouillon and Rampal, 2015).

~~An additional and all-important characteristic~~ To do so, we follow the methodology developed in previous observational studies of the deformation of sea ice that is not captured by these scaling analyses is its strong anisotropy. This property has been made evident since the availability of satellite imagery-derived ice motion products, which showed that high strain rates concentrate along oriented, linear-like faults, or leads, often termed "linear kinematic features" and drift of the Arctic ice pack.

### 7.1 Spatial resolution, convergence and ~~dependence on the initial conditions~~ anisotropy

In a first time, we analyze the overall, macroscopic behaviour of the Maxwell-EB model, ~~its convergence properties and the dependance~~ as well as the convergence and dependence of the so-

lution on the prescribed initial conditions. To do so, a set of four uniaxial compression simulations is run using different spatial resolutions, with  $N = 10, 20, 40$  and  $80$ . The values of the initial, undamaged mechanical parameters are identical between the simulations ~~as well as~~. So is the field of cohesion, which is defined at the lowest resolution ( $N = 10$ ) and interpolated onto the higher resolution mesh grids.

Figure 5 shows the (adimensional) macroscopic stress,  $\sigma_m$  (normal stress integrated on the upper boundary of the domain), as a function of the ~~adimensional~~ (adimensional) macroscopic strain,  $\varepsilon_m$ , set by the prescribed displacement of the upper boundary, for these four simulations. The dotted line represents the damage rate (the number of damaged elements per model time step times their distance to the damage criterion,  $1 - d_{crit}$ ) for the simulation with  $N = 40$ . Inspection of the initial loading and damaging sequence suggests that the mechanical behaviour is similar to that obtained with other elasto-brittle models (e.g., Tang, 1997; Amitrano et al., 1999; Girard et al., 2010). The Maxwell-EB model simulates

1. a strictly linear-elastic behaviour at the initial stage of the experiment, as the material is initially undamaged,
2. a deviation from the linear-elastic behaviour after the onset of damage (marked by the red dot 1), indicative of macroscopic strain softening, with damage distributed homogeneously throughout the material (see Fig. 5 b1),
3. the formation of clusters of damaged elements, non-interacting at first, then joining along linear features. This stage is marked by a rapid increase in the number of damaged elements,
4. a sharp stress drop associated with the macroscopic failure of the sample and propagation of a main fault spanning the entire domain (see Fig. 5 b2).

In the Maxwell-EB model, this last stage is characterized by a drop in the Weissenberg number (i.e., in  $\lambda$ ) localized along the main fault (not shown), where strain rates are orders of magnitude higher than ~~over in~~ undamaged parts of the material. Then, as damaged areas heal, stress builds up again within the material. At all spatial resolutions, the model simulates cycles of slow stress build ups (healing phase) and rapid stress relaxations (damaging phase).

Because the simulations use the same spatial distribution of the damage ~~criteria~~ threshold (i.e., of  $C$ ) the location of the first damage events is the same at all resolutions, as shown by the maps of instantaneous level of damage  $d$  near the onset of damaging (Fig. 5 b1). ~~However, soon after these first failure events, model solutions~~ As soon as the first damage events occur, the heterogeneities introduced in the stress field by these events contribute and, over time, prevail over the initially introduced noise in  $C$  in setting the location and timing of subsequent events (Tang, 1997). Because these heterogeneities tend to localize at the finest scale (i.e., the scale of the mesh element,  $\Delta x$ ), their generation results in a different redistribution of the stress between neighbouring elements and

hence in a non-identical propagation of damage between the model simulations at different spatial resolutions. As illustrated on figure 5, the model solutions therefore do not converge (Fig. 5 b2-4 see panels b, 2 to 4) and fractures form with a shape and orientation differing between simulations: different shapes and orientations.

745 This divergence between the post-damage model solutions illustrates an all-important and intrinsic characteristic of the Maxwell-EB framework arising from the fact that present rheological framework. As other models for the failure of disordered materials (e.g., Cowie et al., 1993; Tang, 1997; Amitrano et al., 1999; Girard et al., 2011), the Maxwell-EB model is based on the standard formulation of damage theory, in which there is no physical characteristic length scale associated with the localization of damage in the model. Through elastic interactions, damage and deformation tend to localize at the finest scale (the mesh element), resulting in a different redistribution of damage redistribution and damage is therefore local. One intrinsic property of this local damage theory is that it allows damage to localize into a zone of vanishing volume (or area) (Bažant, 1976), thereby implying a zero energy dissipation rate in that volume (area). As a consequence, the numerical solutions of finite element local damage models are not objective with respect to the choice of mesh grid and do not converge upon mesh refinement.

These shortcomings have been dealt with by defining damage in models in a non-local manner (see Bažant and Jirásek (2002) for a review of such models). Pijaudier-Cabot and Bažant (1987) for instance have suggested applying the non-local concept to the variables controlling the strain softening, i.e., the level of damage, while keeping a local definition for the elastic strain and stresses in the stress-between-neighbouring elements at different spatial resolutions and hence a non-identical propagation of the damage. Put another way, the divergence of the solutions indicates that while the disorder in  $C$  sets the location of the first damage events, the heterogeneities introduced in the stress field by these events prevail in setting the location and timing of subsequent events. This result is consistent with previous elasto-brittle model simulations which have shown that the number of active faults as well as the degree of localization of the deformation over long time scales do not depend systematically on the disorder initially introduced in the model and that once formed, faults produce their own stress field which dominates further fracture growth linear-elastic constitutive equation. By replacing the damage energy release rate with its spatial average over a representative volume (area), the localization of damage is then limited to a space scale that corresponds to an intrinsic damage length scale for the simulated material. In the context of sea ice, following this approach would entail assuming a minimum size for leads within the ice pack, or a correlation length,  $\xi > \Delta x$  for heterogeneities within the ice cover. Such assumption would however not be physical, as the correlation length associated with natural heterogeneities (see section 4.2) is likely much smaller than that of the grid cell in regional and global sea ice models. In addition, invariance of sea ice fracturing, as revealed from floe sizes distributions, holds down to the meter scale (e.g. Weiss, 2003).



Another important property of the deformation made evident by this set of experiments is its strong anisotropy. The fields of  $d$  and of the total deformation rate ( $\dot{\epsilon}_{tot}$ ) represented on Fig. 5 indeed show that at all spatial resolutions, the simulated damage and deformation are both highly localized and oriented along linear features. This is an important result, as no anisotropy is introduced at the local scale on either the elastic or viscous properties, or in the damage parameterization. ~~This property arises naturally due to elastic interactions within the material and without the need to prescribe fault orientations. It was reproduced by the original EB model and is not lost when including a viscous dissipation term for the stress in~~ In an elastic medium submitted to a loading that is non-perfectly isotropic with respect to the domain geometry or the heterogeneity present in the material, the elastic kernel associated with a damaged inclusion is indeed anisotropic, hence is the redistribution of stresses (Eshelby, 1957). This is illustrated in Fig. 6(a), which shows the field of the Coulomb stress,  $\sigma_{Coulomb} = \sigma_1 - q\sigma_2$  (i.e., the maximum stress with respect to the ~~Maxwell-EB constitutive relationship~~ Mohr-Coulomb damage criterion, right panel) associated with the presence of a circular damaged inclusion in an otherwise homogeneous, isotropic, linear-elastic rectangular plate subjected to the same uniaxial compression loading and boundary conditions as described in section 6. In the simulations presented here each element, as soon as it becomes damaged, plays the role of a damaged inclusion and induces a long-range perturbation in the stress field that is maximum along oriented branches (see Fig. 6b). The combination of (1) small-scale disorder, (2) damage mechanics in an elastic medium and (3) the anisotropy of the elastic interaction kernel itself is sufficient to generate anisotropy, up to very large space scales through successive elastic interactions between damaged elements.

## 7.2 Heterogeneity

As shown in the previous section, when simulations are started from an undamaged state, the simulated mechanical behaviour of the material is intrinsically different between the first and subsequent loading and damaging cycles. The ~~path to the first rupture in "irreversible damage" (i.e., models without healing) elasto-brittle capability of damage models based on a linear-elastic constitutive law to reproduce a deformation that is highly heterogeneous has already been investigated in-depth demonstrated~~ (e.g. Girard et al., 2010; Tang, 1997; Amitrano et al., 1999). ~~Hence~~ However, as these frameworks neither include a healing mechanism nor a slow relaxation of elastic stresses, their post-macroscopic failure behaviour is physically inconsistent, and only the path to the first rupture was analyzed. Hence here we focus our analysis ~~of the spatial dependence of the Maxwell-EB model strain-rate fields~~ on the ~~post-macro-rupture behaviour~~ post-macroscopic rupture behaviour and aim to establish if the strain-rate fields simulated with the Maxwell-EB model model exhibit a similar heterogeneity.

To quantify the ~~heterogeneity~~ spatial localization of the simulated deformation, we follow Marsan et al. (2004) and estimate deformation rates over two orders of magnitude in space scales using a

coarse-graining procedure. The calculation is described in details by Girard et al. (2010). For this analysis we use the-outputs of strain rate fields from simulations with  $N = 100$ , averaged over a  
815 time interval corresponding to the time of propagation of an elastic shear wave with speed  $c$  through  
the width of the domain ( $\frac{L}{2} \frac{1}{T \times c} = N$  time steps). The dependence of the deformation rates on the  
spatial scale of observation is investigated at different stages of the healing-damaging cycle. Figure  
7 (a and b) shows the total deformation rate  $\langle \dot{\epsilon}_{tot} \rangle_l$  as a function of the space scale  $l$  at 5 equally-  
spaced steps along the path towards a given macroscopic failure event, that is, between the minimum  
820 in macroscopic stress that follows the propagation of a fault and the maximum that precedes the  
next macro-rupture, as indicated in Fig. 7(a). Deformation rates are normalized by  $\langle \dot{\epsilon}_{tot} \rangle$  at  
the smallest averaging scale ( $L/N$ ). At the first stage, just following the rupture (red curve), the total  
deformation rate shows a clear power law decrease with increasing spatial scale of the form of Eq.  
(1) over nearly two orders of magnitude of  $l$ , consistent with a strong localization of the deformation.  
825 At the subsequent stages (yellow and green curves), damaged elements progressively recover their  
mechanical strength by healing. Deformation rates decrease along the main fault and re-increases  
over undamaged areas, hence deformation homogenizes over the domain and the rate of decrease of  
 $\langle \dot{\epsilon}_{tot} \rangle_l$  with  $l$  is reduced. Then, as healing allows stress to build up within the material, damaging  
resumes and clusters in space and the localizes again. The exponent  $\beta$  therefore re-increases towards  
830 its post macro-rupture value (blue and purple curves).

Repeating the procedure for subsequent healing and damaging cycles and for multiple realizations  
of the experiment initialized with different cohesion fields showed a similar evolution of the rate of  
decrease of  $\langle \dot{\epsilon}_{tot} \rangle_l$  with  $l$  between macro-ruptures events, with values of  $\beta$  in the vicinity of  
the rupture consistent with previous EB model analyses (e.g., Girard et al., 2010,  $\beta = 0.15 \pm 0.02$ ).  
835 However, an important difference between the present results and that of Girard et al. (2010) is the  
absence of a clear cross-over scale for which  $\langle \dot{\epsilon}_{tot} \rangle_l$  becomes independent of  $l$  and which implies  
a finite correlation length of damage events. This suggests that the Maxwell-EB system progressively  
looses the memory of it's-its initial homogeneous, undamaged state and that an elasto-brittle material  
experiencing both healing and damaging enters a "marginally stable" state with scale invariance  
840 spanning the size of the system. This result is consistent with the scale-dependence analysis of  
RGPS-derived deformation rates of Marsan et al. (2004) and Stern and Lindsay (2009), in which no  
cutoff scale was observed for  $l$  varying between 10 and 1000 km, suggesting that Arctic sea ice is  
most often in a near-critical state.

### 7.3 Intermittency

845 In this section we characterize the temporal behaviour of the Maxwell-EB model. Figure 8(a) rep-  
resents the simulated macroscopic stress as a function of time (black dashed-dotted line) along with  
the corresponding damage rate (grey solid line) record for one realization of the uniaxial compres-

sion experiment with  $N = 40$ . Inspection of both temporal series reveals two types of mechanical behaviour of the Maxwell-EB material.

850 First, the evolution of the macroscopic stress is clearly characterized by cycles of slow stress build-ups and very fast relaxations. The strong asymmetry of the signal in time is confirmed by a high (negative) skewness (-6) of the distribution of the macroscopic stress increments  $\frac{\Delta\sigma_m}{\Delta t}$  (not shown). Associated with these cycles is a succession of progressive increases in damage events and very sharp drops, after which damaging stops momentarily (red arrow on Fig. 8a).

855 Second, as identified on the same time series, some periods (e.g., the interval delimited by the dashed red box) are characterized by a continuous damage activity and by both low amplitude and low frequency fluctuations of the stress. This contrasted behaviour translates into a significantly more symmetric (skewness of -1.9) distribution of  $\frac{\Delta\sigma_m}{\Delta t}$ . Inspection of the spatial distribution of damage (Fig. 8b) and strain rate fields (not shown) over this time interval indicates that the same system of  
860 interacting faults remains activated, with not much damaging activity over the rest of the domain and therefore suggests that creep-like deformation along this system dissipates all of the input loading.

Following the approach taken for fracture-type models which record the number of broken fibres, ruptured bounds, depinning events, etc., we investigate the time-dependence of the simulated damage activity by analyzing time series of ~~the~~ discrete failure events. We estimate the power spectral density  
865 (PSD) of damage rate time series. The resulting squared Fourier coefficients are averaged over 5 realizations of the compression experiment initialized with different fields of  $C$  over domains with  $N = 40$ . Fig. 9(a) represents the spectral density estimated by averaging the power over a 5 values window centred on each frequency  $f$ . We checked that using a smaller averaging window does not affect the shape of the PSD discussed below.

870 At low frequencies, the PSD is almost flat, suggesting that the number of damage events is uncorrelated in time. As these frequencies are lower than  $\frac{1}{T_h}$ , this is consistent with the fact that the Maxwell-EB material entirely loses the memory of previous damage events when allowed to heal completely. At higher frequencies, the PSD shows a decrease with increasing  $f$  reminiscent of a temporal correlation of damaging events in the material. This expresses as a power law decay with  
875  $\text{PSD}(f) = 1/f^\gamma$ . At intermediate frequencies, we estimate a slope  $\gamma = 2$ , suggesting that the instantaneous damage rate is correlated in time but *increments* of the damage rate are uncorrelated. At the highest frequencies,  $\gamma > 2$ , indicating that the damage rate is correlated in time and ~~the of damage rate~~ rate-damage rate increments are anti-correlated. The break in the slope occurs around  $f = 10^6$ , a frequency that we relate to the minimum propagation time of a macro-rupture, i.e., the time of prop-  
880 agation of damage (i.e., of an elastic shear wave with speed  $c$ ) across the width  $\frac{L}{2}$  of the domain ( $N$  time steps). The transition between the flat and power law decaying parts of the PSD is marked by a clear peak spanning the range of frequencies corresponding to the cycles of healing and damaging, the ~~red~~-dashed line indicating the frequency of such a cycle, as identified by the double arrow on Fig. 8(a).

885 Finally, we analyze the ~~dependance~~ dependence of the simulated deformation on the time scale of observation using a temporal coarse-graining method (e.g., Rampal et al., 2008). Components of the strain rate at a given spatial scale are averaged over a time window of duration  $t$  to compute the mean total deformation rate  $\langle \dot{\epsilon}_{tot} \rangle_t$ . The window is centred on an arbitrary time  $t_0$  and has a size  $t = 2n \times (N\Delta t)$  with  $n = 1, 2, 3, \dots$  and with the smallest averaging time scale corresponding to the  
890 time of propagation of an elastic shear wave with speed  $c$  across the width  $\frac{L}{2}$  of the domain. The chosen spatial averaging scale is that of the highest deformation rate, which as shown in section 1 is of  $\frac{L}{N}$ . The domain is therefore divided in square boxes of equal size  $l = \frac{L}{N}$  and the calculated deformation invariants are averaged over all available boxes. Figure 9(b) shows the total deformation rate  $\langle \dot{\epsilon}_{tot} \rangle_t$  as a function of the time of observation  $t$  (thick black line) averaged over 20 realizations  
895 of the coarse graining calculation (thin ~~coloured~~ grey lines) centred on different  $t_0$  for a simulation with  $N = 40$ . Consistent with the localizing of the deformation and an intermittent process,  $\langle \dot{\epsilon}_{tot} \rangle_t$  decreases with increasing  $t$  over almost two orders of magnitudes of  $t$ .

The observed scaling is however altered in two ways, which relate to the specific geometry, loading and boundary conditions used in the present simulations. First, as one main fault always dominates the deformation in the system, curves of  $\langle \dot{\epsilon}_{tot} \rangle_t$  are strongly modulated by a succession  
900 of peaks associated with the cycles of stress build-up and macro-rupture, the amplitude of which decreases with the scale of observation  $t$ . Second, at large  $t$ , the scaling ~~assymptotes~~ asymptotes to a value corresponding to the prescribed forcing. Simulations over larger systems using non-homogeneous surface forcing should allow for multiple macroscopic scale faults to be active si-  
905 multaneously and hence to observe a clearer scaling of the simulated deformation over larger time spans.

## 8 Conclusions

In this paper we have presented a new mechanical framework suited for modelling the brittle behaviour of the sea ice cover (Weiss et al., 2007) while keeping a continuum description. A relaxation  
910 term for the internal stress is added to the original Elasto-Brittle constitutive ~~relationship-law~~ relationship-law and both the linear and viscous components are coupled to a progressive damage mechanism to allow partitioning between the reversible and permanent deformations ~~within the material based on its~~ based on the local level of damage of the material.

Highly idealized simulations using forcing conditions homogeneous in both space and time show  
915 the Maxwell-EB model simulates a complex temporal and spatial evolution of the deformation patterns, in close agreement with observations of the Arctic sea ice cover. Anisotropy in the simulated damage and deformation fields arises naturally from the small-scale disorder and elastic interactions, although the material's properties are fully isotropic at the element scale. The model also reproduces both the persistence of creeping leads and the activation of new leads with different shapes and ori-

920 entations, in agreement with the observed deformation of sea ice (Coon et al., 2007). Analyses of the simulated damage and deformation fields reveal

1. a highly heterogeneous deformation, translating into a power law decrease of the deformation rate with increasing spatial scale. The associated exponent varies periodically: it is highest in the vicinity of macro-rupture events and decreases between events as the material partially  
925 heals. The disappearance after a few "spinup" rupture events of a cross-over scale at which deformation rates become independent of the scale of observation suggests that the Maxwell-EB model, including both damaging and healing processes, successfully reproduces a "marginally stable" state, as observed for Arctic sea ice.
2. an intermittent deformation, manifested by the highly asymmetric temporal evolution of the  
930 internal stress within the material, which shows a succession of slow build-ups and very rapid relaxation phases. This intermittency is supported by the existence of a temporal correlation in the rate of damage at all timescales below the ~~material's~~ characteristic healing time of the material. A temporal scaling of the deformation rate is also obtained but due to the specific setup of the simulations analyzed here, it is modulated by the cycles of stress build-up and  
935 relaxation and its span is limited by the prescribed forcing.

Considering the highly idealized setup of the simulations analyzed here, these temporal and spatial scaling properties in the deformation fields cannot possibly be inherited from the prescribed forcing. Instead, their emergence is a signature of the mechanical behaviour of the Maxwell-EB model itself.

The next logical step in the development of a Maxwell-EB sea ice rheology consists in analyzing  
940 the sensitivity of the simulated deformation and damage fields to the model parameters. In particular, the partitioning between the simulated brittle and creep-like behaviour as well as the degree of localization of the deformation (Frederiksen and Braun, 2001) might depend on the rate of decrease of the viscous relaxation time with increasing level of damage (parameter  $\alpha$ ) and on the characteristic time for healing and associated healing parameterization, all of which are poorly constrained in the  
945 case of the ice pack.

Further validation of the Maxwell-EB framework and the determination of the range of model parameters values suitable for sea ice call for a thorough comparison of the scaling properties of the simulated deformation rates with that estimated from the available ice buoy and RGPS data. Such analysis necessitates carrying out numerical experiments over periods of several days to months and  
950 over realistic domains of regional to global scales. At these spatial and temporal scales, deformations within the sea ice cover become large. Hence advective processes cannot be neglected. As the Maxwell-EB rheology effectively reproduces very strong spatial gradients within the velocity, strain and stress fields, its use in large-deformation experiments requires the implementation of a robust advection scheme in order to limit diffusion and retain the strong localization of damage and deformation rates. The development of a numerical scheme for the ~~the~~ Maxwell-EB model that includes  
955

advection and is both efficient and practical in view of dynamic-thermodynamic and fully coupled ocean-sea ice-atmosphere simulations is underway.

*Acknowledgements.* The financial support of TOTAL EP RECHERCHE DEVELOPPEMENT is gratefully acknowledged. V. Dansereau has been supported by ANRT. A. Audibert-Hayet, E. Coche and K. Riska are thanked  
960 for valuable suggestions and support on this work. [We also thank the reviewers, Chris Borstad and Arne Keller, for their comments and helpful advices, which improved the quality of this work.](#) V.D. acknowledges support from the National Sciences and Engineering Research Council of Canada and from the Fonds Québécois de la Recherche sur la Nature et les Technologies.

## References

- 965 Agnon, A. and Lyakhovsky, V.: Damage distribution and localization during dyke intrusion, pp. 65–78, A. A. Balkema, Brookfield, Vt, 1995.
- Amitrano, D., Grasso, J.-R., and Hantz, D.: From diffuse to localised damage through elastic interaction, *Geophysical Research Letters*, 26, 2109–2112, 1999.
- Aranson, I. S. and Tsimring, L. S.: Patterns and collective behavior in granular media: Theoretical concepts, *Rev. Mod. Phys.*, 78, 641–692, doi:10.1103/RevModPhys.78.641, <http://link.aps.org/doi/10.1103/RevModPhys.78.641>, 2006.
- 970 Bažant, Z. P.: Instability ductility and size effect in strain-softening concrete, *Journal of Engineering Mechanics Division*, 102, 331–344, 1976.
- Bažant, Z. P. and Jirásek, M.: Nonlocal Integral Formulations of Plasticity and Damage: Survey of Progress, *Journal of Engineering Mechanics*, 128, 1119–1149, doi:10.1061/(ASCE)0733-9399(2002)128:11(1119), [http://dx.doi.org/10.1061/\(ASCE\)0733-9399\(2002\)128:11\(1119\)](http://dx.doi.org/10.1061/(ASCE)0733-9399(2002)128:11(1119)), 2002.
- 975 Borstad, C. P., Khazendar, A., Larour, E., Morlighem, M., Rignot, E., Schodlok, M. P., and Seroussi, H.: A damage mechanics assessment of the Larsen B ice shelf prior to collapse: Toward a physically-based calving law, *Geophysical Research Letters*, 39, doi:10.1029/2012GL053317, 118502, 2012.
- 980 Bouillon, S. and Rampal, P.: Presentation of the dynamical core of neXtSIM a new sea ice model, *Ocean Modelling*, 91, 23–37, doi:<http://dx.doi.org/10.1016/j.ocemod.2015.04.005>, 2015.
- Byerlee, J.: Friction of rocks, *Pure and Applied Geophysics*, 116, 615–626, doi:10.1007/BF00876528, 1978.
- Cakir, Z., Ergintav, S., Ozener, H., Dogan, U., Akoglu, A. M., Meghraoui, M., and Reilinger, R.: Onset of aseismic creep on major strike-slip faults, *Geology*, 40, 1115–1118, doi:10.1130/G33522.1, 2012.
- 985 Cetin, E., Cakir, Z., Meghraoui, M., Ergintav, S., and Akoglu, A. M.: Extent and distribution of aseismic slip on the Işmetpaşa segment of the North Anatolian Fault (Turkey) from Persistent Scatterer InSAR, *Geochemistry, Geophysics, Geosystems*, 15, 2883–2894, doi:10.1002/2014GC005307, <http://dx.doi.org/10.1002/2014GC005307>, 2014.
- 990 Coon, M., Kwok, R., Levy, G., Puis, M., Schreyer, H., and Sulsky, D.: Arctic Ice Dynamics Joint Experiment (AIDJEX) assumptions revisited and found inadequate, *Journal of Geophysical Research*, 112, doi:10.1029/2005JC003393, 2007.
- Cowie, P. A., Vanneste, C., and Sornette, D.: Statistical Physics Model for the Spatiotemporal evolution of faults, *Journal of Geophysical Research*, 98, 21 809–21 821, 1993.
- 995 Cowie, P. A., Sornette, D., and Vanneste, C.: Multifractal scaling properties of a growing fault population, *Geophysical Journal International*, 122, 457–469, 1995.
- Duval, P., Ashby, M. F., and Anderman, I.: Rate-controlling processes in the creep of polycrystalline ice, *The Journal of Physical Chemistry*, 87, 4066–4074, doi:10.1021/j100244a014, 1983.
- Eshelby, J. D.: The Determination of the Elastic Field of an Ellipsoidal Inclusion, and Related Problems, *Proceedings of the Royal Society of London A: Mathematical, Physical and Engineering Sciences*, 241, 376–396, doi:10.1098/rspa.1957.0133, 1957.
- 1000 Fattal, R. and Kupferman, R.: Constitutive laws for the matrix-logarithm of the conformation tensor, *Journal of Non-Newtonian Fluid Mechanics*, 123, 281–285, 2004.

- Fattal, R. and Kupferman, R.: Time-dependent simulation of viscoelastic flows at high Weissenberg number using the log-conformation representation, *Journal of Non-Newtonian Fluid Mechanics*, 126, 23–37, 2005.
- 1005 Flato, G., Marotzke, J., Abiodun, B., Braconnot, P., Chou, S. C., Collins, W., Cox, P., Driouech, F., Emori, S., Eyring, V., Forest, C., Gleckler, P., Guilyardi, E., Jakob, C., Kattsov, V., C., R., and Rummukainen, M.: *Climate Change 2013: The Physical Science Basis. Contribution of Working Group I to the Fifth Assessment Report of the Intergovernmental Panel on Climate Change*, chap. Evaluation of Climate Models, p. 126 pp., Cambridge University Press, Cambridge, United Kingdom and New York, NY, USA, 2013.
- 1010 Fortt, A. L. and Schulson, E. M.: The resistance to sliding along Coulombic shear faults in ice, *Acta Materialia*, 55, 2253–2264, 2007.
- Frederiksen, S. and Braun, J.: Numerical modelling of strain localisation during extension of the continental lithosphere, *Earth and Planetary Science Letters*, 188, 241–251, 2001.
- Girard, L., Weiss, J., Molines, J. M., Barnier, B., and Bouillon, S.: Evaluation of high-resolution sea ice models on the basis of statistical and scaling properties of Arctic sea ice drift and deformation, *Journal of Geophysical Research*, 114, doi:10.1029/2008JC005182, 2009.
- 1015 Girard, L., Amitrano, D., and Weiss, J.: Failure as a critical phenomenon in a progressive damage model, *Journal of Statistical Mechanics : Theory and Experiment*, P01013, doi:10.1088/1742-5468/2010/01/P01013, 2010.
- Girard, L., Bouillon, S., Weiss, J., Amitrano, D., Fichefet, T., and Legat, V.: A new modeling framework for sea ice models based on elasto-brittle rheology, *Annals of Glaciology*, 52, 2011.
- 1020 Gratier, J. P., Renard, F., and Vial, B.: Postseismic pressure solution creep: Evidence and time-dependent change from dynamic indenting experiments, *Journal of Geophysical Research: Solid Earth*, 119, 2764–2779, doi:10.1002/2013JB010768, 2014.
- Hamiel, Y., Liu, Y., Lyakhovsky, V., Ben-Zion, Y., and Lockner, D.: A viscoelastic damage model with applications to stable and unstable fracturing, *Geophysical Journal International*, 159, 1155–1165, doi:10.1111/j.1365-246X.2004.02452.x, 2004.
- 1025 Herrmann, H. J. and Roux, S., eds.: *Statistical Models for the fracture of disordered media*, North-Holland, Amsterdam, 1990.
- Hibler, W. D. I.: A viscous sea ice law as a stochastic average of plasticity, *Journal of Geophysical Research*, 82, 3932–3938, 1977.
- 1030 Hibler, W. D. I.: A dynamic thermodynamic sea ice model, *Journal of Physical Oceanography*, 9, 815–846, 1979.
- Hibler, W. I.: Sea ice fracturing on the large scale, *Engineering Fracture Mechanics*, 68, 2013 – 2043, doi:http://dx.doi.org/10.1016/S0013-7944(01)00035-2, 2001.
- 1035 Hutchings, J. K., Roberts, A., Geiger, C. A., and Richter-Menge, J.: Spatial and temporal characterization of sea-ice deformation, *Annals of Glaciology*, 52, 360–368, 2011.
- Jaeger, J. C. and Cook, N. G. W.: *Fundamentals of Rock Mechanics*, Chapman and Hall, Cambridge UK, 1979.
- Jop, P., Forterre, Y., and Pouliquen, O.: A constitutive law for dense granular flows, *Nature*, 441, 727–230, doi:10.1038/nature04801, 2006.
- 1040 Kagan, Y.: Fractal dimension of brittle fracture, *Journal of Nonlinear Science*, 1, 1–16, doi:10.1007/BF01209146, 1991.



- Kagan, Y. Y. and Jackson, D. D.: Long-Term Earthquake Clustering, *Geophysical Journal International*, 104, 117–134, doi:10.1111/j.1365-246X.1991.tb02498.x, 1991.
- Kagan, Y. Y. and Knopoff, L.: Spatial distribution of earthquakes: the two-point correlation function, *Geophysical Journal International*, 62, 303–320, doi:10.1111/j.1365-246X.1980.tb04857.x, 1980.
- 1045 Keller, A. and Hutter, K.: A viscoelastic damage model for polycrystalline ice, inspired by Weibull-distributed fiber bundle models. Part I: Constitutive models, *Continuum Mechanics and Thermodynamics*, 26, 879–894, doi:10.1007/s00161-014-0348-7, <http://dx.doi.org/10.1007/s00161-014-0348-7>, 2014.
- Keunings, R.: On the high Weissenberg number problem, *Journal of Non-Newtonian Fluid Mechanics*, 20, 1050 209–226, 1986.
- King, G. C. P., Stein, R. S., and Lin, J.: Static stress change and the triggering of earthquakes, *Bulletin of the Seismological Society of America*, 84, 935–953, 1994.
- Krug, J., Weiss, J., Gagliardini, O., and Durand, G.: Combining damage and fracture mechanics to model calving, *The Cryosphere*, 8, 2101–2117, doi:10.5194/tc-8-2101-2014, <http://www.the-cryosphere.net/8/2101/2014/>, 2014.
- 1055 Kwok, R.: Deformation of the Arctic Ocean sea ice cover: November 1996 through April 1997, in: *IUTAM Symposium on Scaling Laws in Ice Mechanics and Ice Dynamics*, edited by Dempsey, J. and Shen, H. H., *Solid Mechanics and Its Applications*, pp. 315–323, Springer Netherlands, doi:10.1007/978-94-015-9735-7, 2001.
- 1060 Kwok, R., Hunke, E. C., Maslowski, W., Menemenlis, D., and Zhang, J.: Variability of sea ice simulations assessed with RGPS kinematics, *Journal of Geophysical Research: Oceans*, 113, doi:10.1029/2008JC004783, <http://dx.doi.org/10.1029/2008JC004783>, c11012, 2008.
- Lindsay, R. W., Zhang, J., and Rothrock, D. A.: Sea-ice deformation rates from satellite measurements and in a model, *Atmosphere-Ocean*, 41, 35–47, doi:10.3137/ao.410103, 2003.
- 1065 Lyakhovsky, V., Ben-Zion, Y., and Agnon, A.: Distributed damage, faulting and friction, *Journal of Geophysical Research*, 102, 27 635–27 649, 1997.
- Marsan, D. and Weiss, J.: Space/time coupling in brittle deformation at geophysical scales, *Earth and Planetary Science Letters*, 296, 353–359, 2010.
- Marsan, D., Stern, H., Lindsay, R., and Weiss, J.: Scale dependence and localization of the deformation of 1070 Arctic sea ice, *Physical Review Letters*, 93, doi:10.1103/PhysRevLett.93.178501, 2004.
- Marsan, D., Weiss, J., Metaxian, J.-P., Grangeon, J., Roux, P.-F., and Haapala, J.: Low frequency bursts of horizontally-polarized waves in the Arctic sea-ice cover, *Journal of Glaciology*, 57, 231–237, 2011.
- Maxwell, J. C.: On the dynamical theory of gases, *Philosophical Transactions of the Royal Society of London*, 157, 49–88, 1867.
- 1075 Maykut, G. A.: The surface heat and mass balance, pp. 395–463, *NATO ASI series, Series B: Physics*, Springer US, doi:10.1007/978-1-4899-5352-0\_6, 1986.
- Nye, J. F.: Is there any physical basis for assuming linear viscous behavior for sea ice?, *Aidjex Bulletin*, 6, 18–19, 1973.
- Paul, B.: A modification of the Coulomb-Mohr theory of fracture, *Journal of Applied Mechanics*, 28, 259–268, 1080 1961.

- Petrich, C., Langhorne, P., and Haskell, T.: Formation and structure of refrozen cracks in land-fast first-year sea ice, *Journal of Geophysical Research*, 112, C04,006, doi:10.1029/2006JC003466, 2007.
- Pijaudier-Cabot, G. and Bazant, Z. P.: Nonlocal damage theory, *Journal of Engineering Mechanics*, 113, 1512–1533, 1987.
- 1085 Pralong, A. and Funk, M.: Dynamic damage model of crevasse opening and application to glacier calving, *Journal of Geophysical Research: Solid Earth*, 110, doi:10.1029/2004JB003104, <http://dx.doi.org/10.1029/2004JB003104>, b01309, 2005.
- Rampal, P., Weiss, J., Marsan, D., Lindsay, R., and Stern, H.: Scaling properties of sea ice deformation from buoy dispersion analysis, *Journal of Geophysical Research: Oceans*, 113, n/a–n/a, doi:10.1029/2007JC004143, <http://dx.doi.org/10.1029/2007JC004143>, c03002, 2008.
- 1090 Rampal, P., Weiss, J., Marsan, D., and Bourgoin, M.: Arctic sea ice velocity field: General circulation and turbulent-like fluctuations, *Journal of Geophysical Research: Oceans*, 114, n/a–n/a, doi:10.1029/2008JC005227, <http://dx.doi.org/10.1029/2008JC005227>, c10014, 2009.
- Rothrock, D. A.: The energetics of the plastic deformation of pack ice by ridging, *Journal of Geophysical Research*, 80, 4514–4519, 1975.
- 1095 Sakov, P., Counillon, F., Bertino, L., Lisaeter, K. A., Oke, P. R., and Korablev, A.: TOPAZ4: An ocean-sea ice data assimilation system for the North Atlantic and Arctic, *Ocean Sciences*, 8, 633–656, doi:10.5194/os-8-633-2012, 2012.
- Saramito, P.: On a modified non-singular log-conformation formulation for Johnson-Segalman viscoelastic fluids, *Journal of Non-Newtonian Fluid Mechanics*, 211, 16–30, 2014.
- 1100 Saramito, P.: Complex fluids. Modelling and algorithms, To appear - Springer, 2016.
- Schapery, R. A.: Nonlinear viscoelastic and viscoplastic constitutive equations with growing damage, *International Journal of Fracture*, 97, 33–66, 1999.
- Scholz, C. H.: *The Mechanics of Earthquakes and Faulting*, Cambridge University Press, New York, 2 edn., 1105 2002.
- Schreyer, H. L., Sulsky, D. L., Munday, L. B., Coon, M. D., and Kwok, R.: Elastic-decohesive constitutive model for sea ice, *Journal of Geophysical Research*, 111, doi:10.1029/2005JC003334, 2006.
- Schulson, E., Fortt, A., Iliescu, D., and Renshaw, C.: On the role of frictional sliding in the compressive fracture of ice and granite: Terminal vs. post-terminal failure, *Acta Materialia*, 54, 3923 – 3932, doi:10.1016/j.actamat.2006.04.024, 2006b.
- 1110 Schulson, E. M.: Compressive shear faults within arctic sea ice: Fractures on scales large and small, *Journal of Geophysical Research*, 109, doi:10.1029/2003JC002108, 2004.
- Schulson, E. M.: Failure envelope of first-year Arctic sea ice: The role of friction in compressive fracture, *Journal of Geophysical Research*, 111, doi:10.1029/2005JC003235, 2006a.
- 1115 Schulson, E. M. and Duval, P.: *Creep and Fracture of Ice*, Cambridge University Press, Cambridge, UK, 2009.
- Smith, G. C., Roy, F., Rezka, M., Surcel, M., Colan, D., Deacu, Z. He, D., Bélanger, J.-M., Skachko, S., Liu, Y., Dupont, F., Lemieux, J.-F., Beaudoin, C., Tranchant, B., Drévilion, M., Garric, G., Testut, C.-E., Lelouche, J.-M., Pellerin, P., Ritchie, H., Lu, Y., Davidson, F., Buehner, M., Caya, A., and Lajoie, M.: Sea ice forecast verification in the Canadian Global Ice Ocean Prediction System, *Quarterly Journal of the Royal Meteorological Society*, doi:10.1002/qj.2555, 2015.
- 1120

- Stein, R. S.: The role of stress transfer in earthquake occurrence, *Nature*, 402, 605–609, doi:10.1038/45144, 1999.
- Stern, H. L. and Lindsay, R. W.: Spatial scaling of Arctic sea ice deformation, *Journal of Geophysical Research*, 114, doi:10.1029/2009JC005380, 2009.
- 1125 Stern, H. L., Rothrock, D. A., and Kwok, R.: Open water production in arctic sea ice: Satellite measurements and model parameterizations, *Journal of Geophysical Research*, 100, 20 601–20 612, 1995.
- Tang, C.: Numerical Simulation of Progressive Rock Failure and Associated Seismicity, *International Journal of Rock Mechanics and Mining Sciences*, 34, 249–261, 1997.
- Timco, G. and Weeks, W.: A review of the engineering properties of sea ice, *Cold Regions Science and Technology*, 60, 107 – 129, doi:http://dx.doi.org/10.1016/j.coldregions.2009.10.003, 2010.
- 1130 Tsamados, M., Feltham, D. L., and Wilchinsky, A. V.: Impact of a new anisotropic rheology on simulations of Arctic sea ice, *Journal of Geophysical Research: Oceans*, 118, 91–107, doi:10.1029/2012JC007990, 2013.
- Turcotte, D. L.: *Fractals and Chaos in geology and geophysics*, Cambridge University Press, New York, 1992.
- Weiss, J.: Scaling of Fracture and Faulting of Ice on Earth, *Surveys in Geophysics*, 24, 185–227, doi:10.1023/A:1023293117309, http://dx.doi.org/10.1023/A:1023293117309, 2003.
- 1135 Weiss, J. and Schulson, E. M.: Coulombic faulting from the grain scale to the geophysical scale: lessons from ice, *Journal of Physics D: Applied Physics*, 42, 214 017, 2009.
- Weiss, J., Schulson, E. M., and Stern, H. L.: Sea ice rheology from in-situ, satellite and laboratory observations: Fracture and friction, *Earth and Planetary Science Letters*, 255, 1–8, 2007.
- 1140 Wilchinsky, A. V. and Feltham, D. L.: Modelling the rheology of sea ice as a collection of diamond-shaped floes, *Journal of Non-Newtonian Fluid Mechanics*, 138, 22–32, 2006.

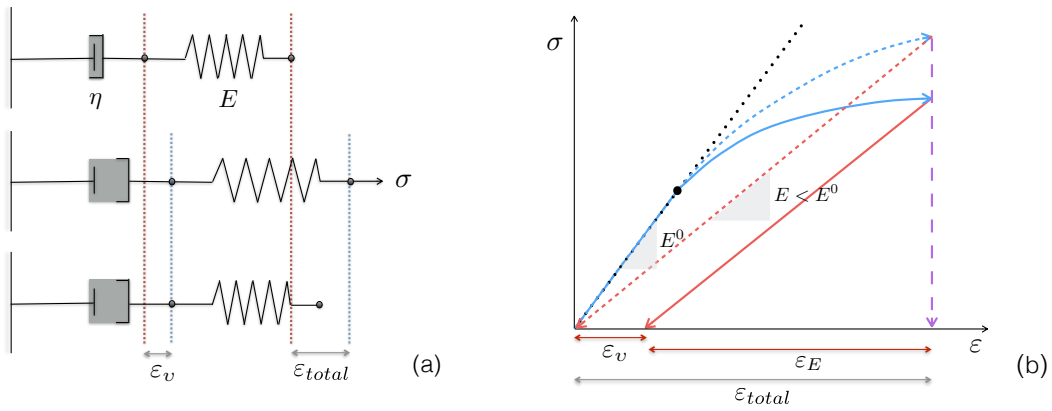

**Figure 1.** (a) Schematic representations of the Maxwell model for a continuum material with elastic (shear) modulus  $E$  and viscosity  $\eta$ . At time  $t$ , a stress is applied on the system. It is removed at time  $t + \Delta t$ : the spring goes back to its initial position but the dashpot retains its deformation  $\epsilon_v$ . (b) Loading-unloading paths for a material with initial elastic modulus  $E^0$  in the linear-elastic (dotted), EB (dashed) and Maxwell-EB (solid lines) model. The black dot indicates the onset of damaging in the EB and Maxwell-EB models. Unlike the EB model, the Maxwell-EB model allows partitioning the total deformation into a permanent ( $\epsilon_v$ ) and an elastic contribution ( $\epsilon_E$ ), as indicated by the red arrows along the deformation axis. The diagram is not to scale in the context of modelling the lithosphere or sea ice: in these geomaterials, permanent deformations can become much greater than elastic deformations as damage events accumulate over time.

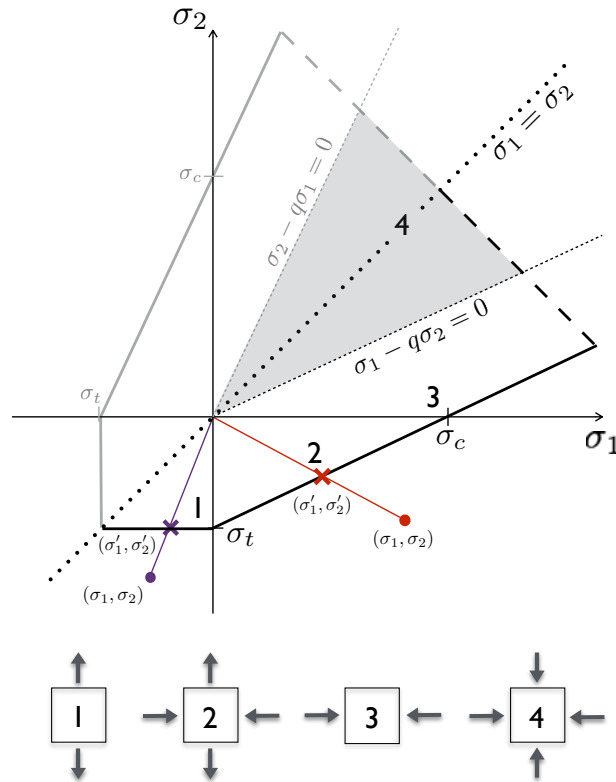

**Figure 2.** Damage criterion of the Maxwell-EB model in the principal stresses plane (solid line) combining the Mohr-Coulomb and tensile stress criteria. The thick dashed line represents a biaxial compression truncation that closes the envelope but is not applied in the present model. Compression is taken positive and the dotted line indicates the  $\sigma_1 = \sigma_2$  axis. Numbers indicate the states of (1) uniaxial tension, (2) biaxial tension and compression, (3) uniaxial compression and (4) biaxial compression and their location relative to the envelope. The calculation of the distance to the damage criterion  $d_{crit}$ , defined by the intersection  $(\sigma'_1, \sigma'_2)$  of the line relating the state of stress  $(\sigma_1, \sigma_2)$  of a given element to the origin of the principal stress plane, is represented in red in the case of exceeding the Mohr-Coulomb criterion and in purple, the tensile strength criterion.

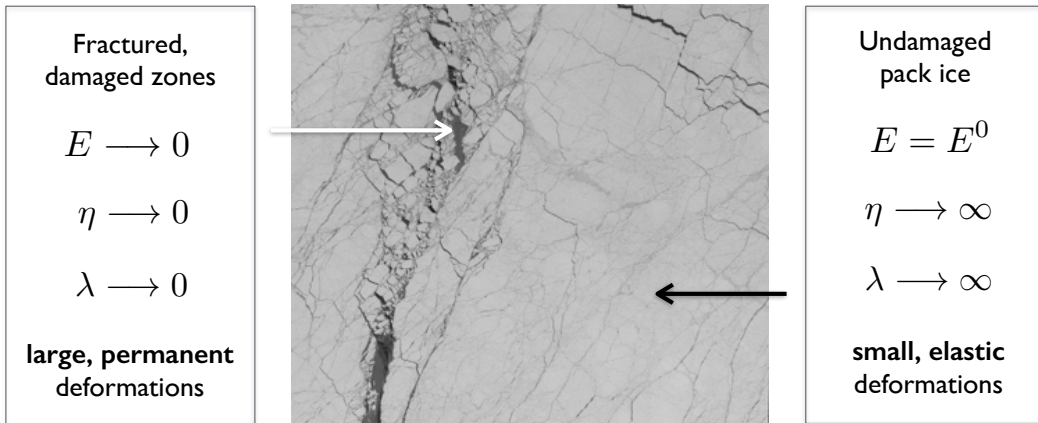

**Figure 3.** Dependence of the apparent viscosity ( $\eta$ ), of the elastic modulus ( $E$ ) and of the relaxation time ( $\lambda$ ) on the level of damage in the Maxwell-EB sea ice model. The image is a SPOT satellite aerial picture of a 59 km  $\times$  59 km portion of the Arctic sea ice cover centred around 80.18 N, 108.55 W.

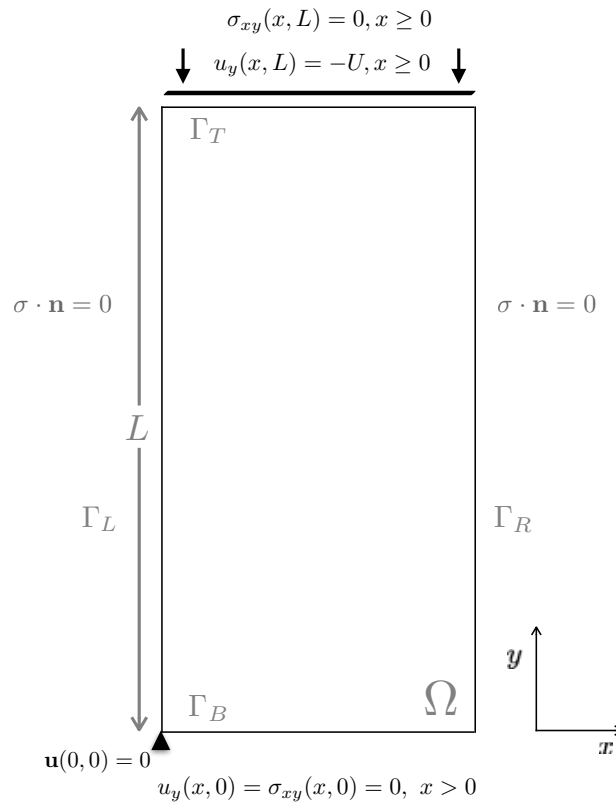

**Figure 4.** Domain and boundary conditions for the uniaxial compression experiment.

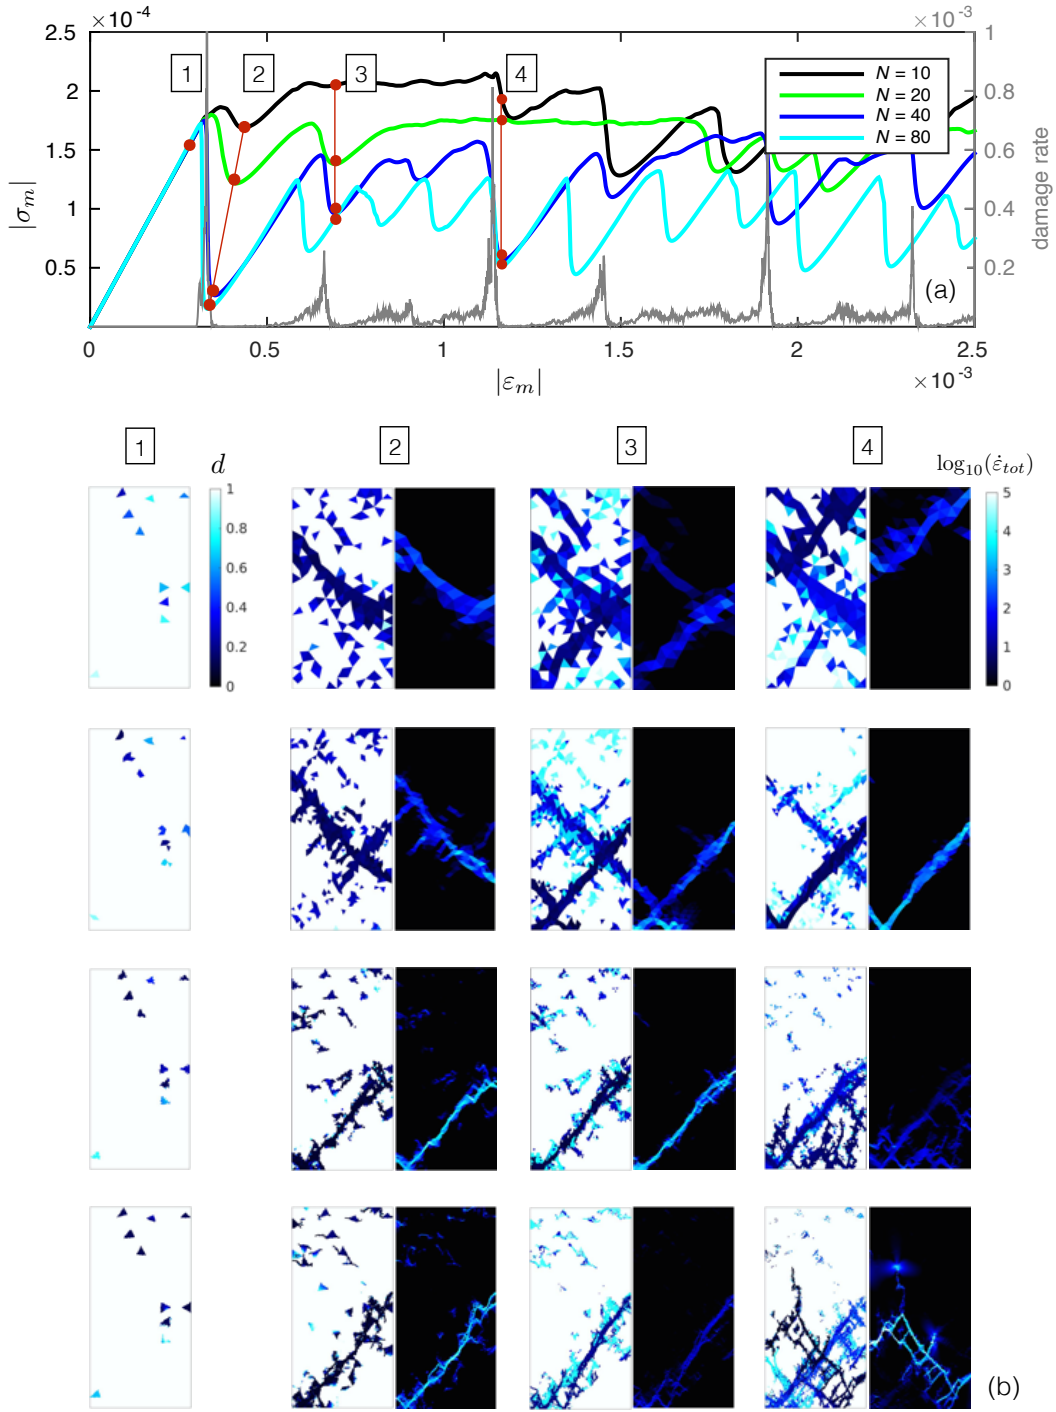

**Figure 5.** (a) Macroscopic stress versus macroscopic strain (solid lines) for four uniaxial compression simulations with different spatial resolutions and damage rate (dashed number of damaged elements times  $1 - d_{crit}$ , grey line) for the simulation with  $N = 40$ . All simulations are initialized with the same values of the mechanical parameters and cohesion with the same field of cohesion ( $C$ ) defined at the lowest spatial resolution ( $N = 10$ ). (b) Fields of the instantaneous level of damage (left panels) and of the order of magnitude of the total deformation rate ( $\log_{10}(\dot{\varepsilon}_{tot})$ , right panels) at the four different times indicated on Fig. (a) and for the four simulations (resolution increasing from top to bottom).

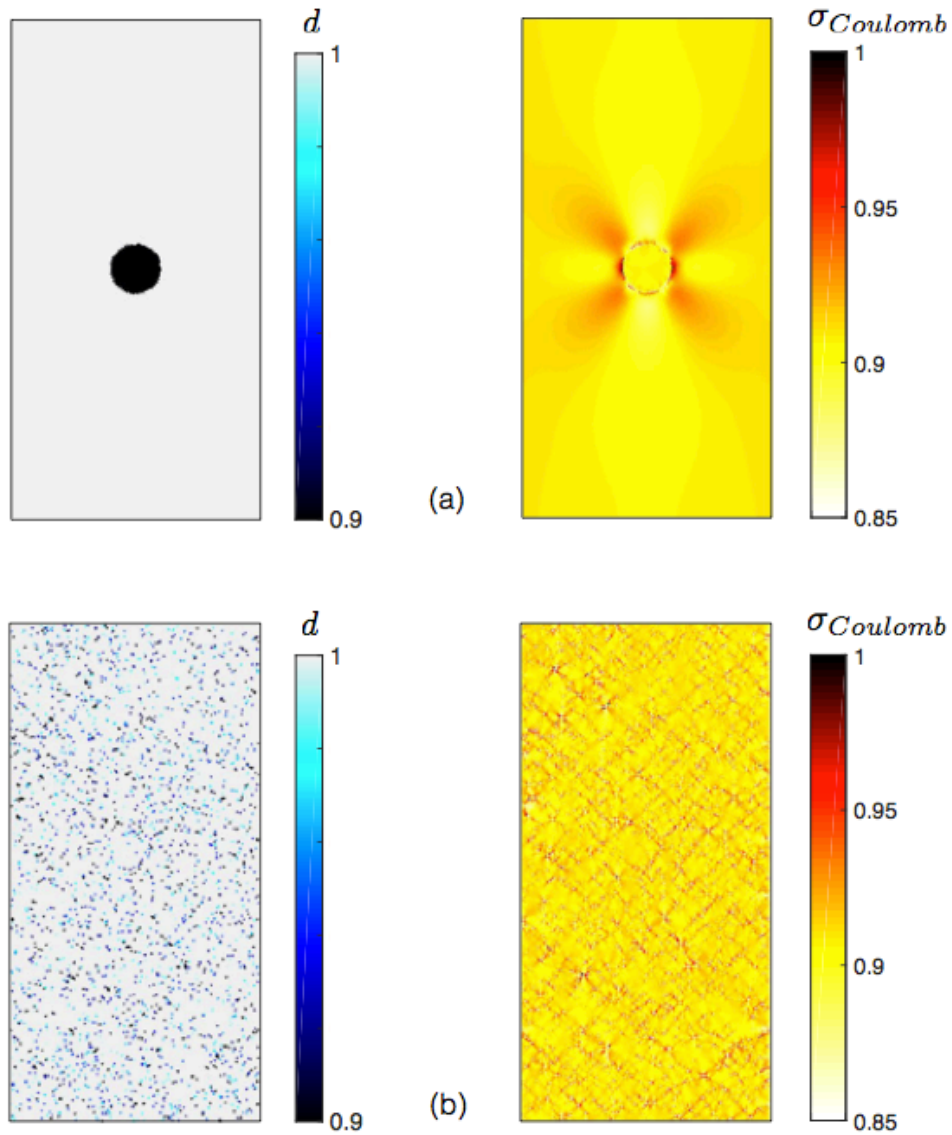

**Figure 6.** Coulomb's stress field (the normalized maximum stress with respect to the Mohr-Coulomb damage criterion) generated by (a) a circular inclusion defined on the initial field of the level of damage ( $d = 0.9$ ) in an otherwise undamaged ( $d = 1$ ), homogeneous and linear-elastic material (left) and (b) by local damage events within an initially undamaged material in which disorder is introduced through the damage criterion via the field of cohesion,  $C$ . In both cases, the plate is subjected to the same uniaxial compression and boundary conditions as described in section 6 and figure 4.



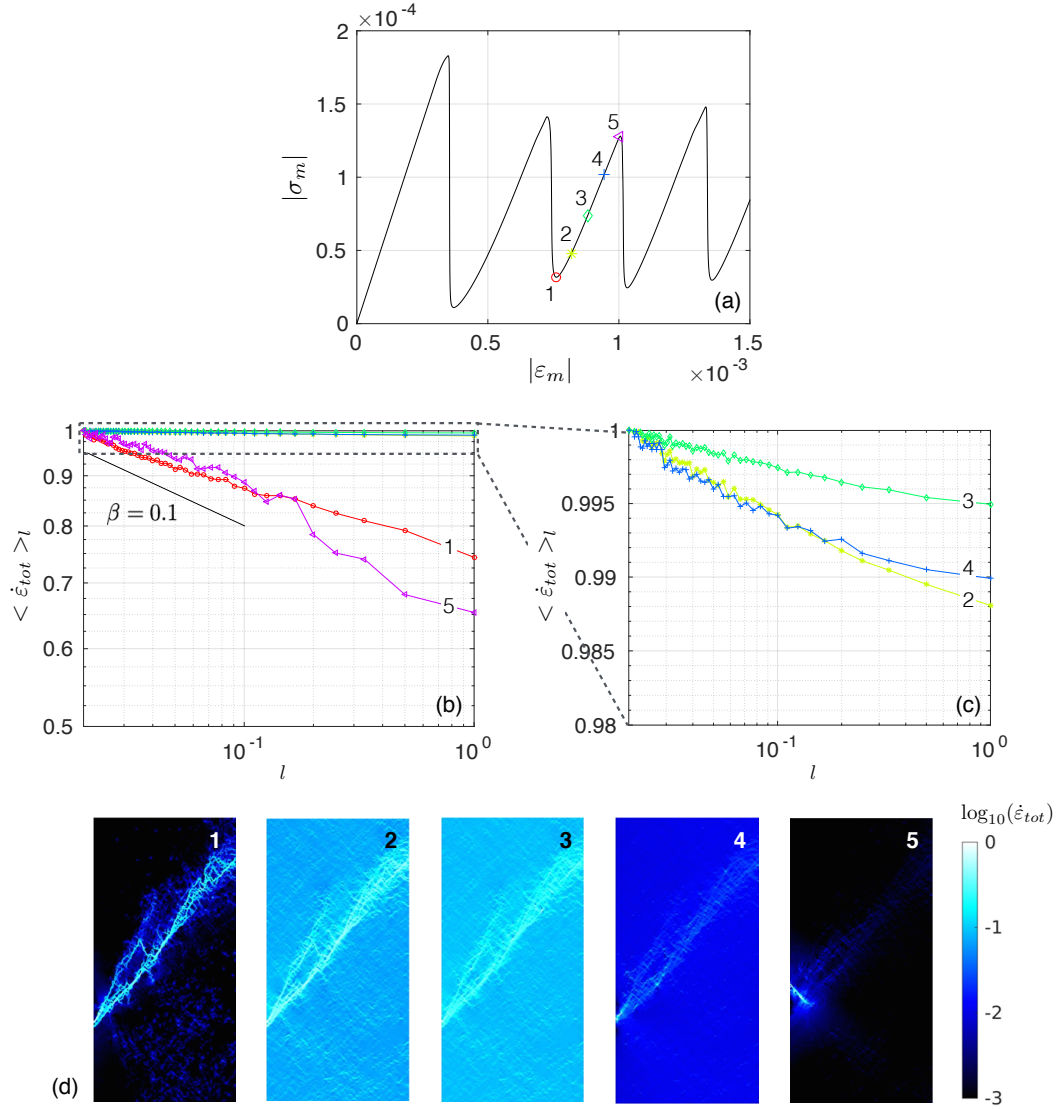

**Figure 7.** (a) Macroscopic stress as a function of the macroscopic strain for one realization of the uniaxial compression experiment with  $N = 100$ . (b) Total deformation rate as a function of the spatial scale  $l$  ( $l = \frac{L}{2n}$  with  $1 \leq n \leq N/2$ ), normalized at the smallest scale  $L/N$ , at the five stages indicated on panel (a). (c) Zoom into panel (b) for the second, third and fourth stages. (d) Corresponding fields of the order of magnitude of the total deformation rate ( $\log_{10}(\dot{\varepsilon}_{tot})$ ) normalized by the maximum value of  $\dot{\varepsilon}_{tot}$ .

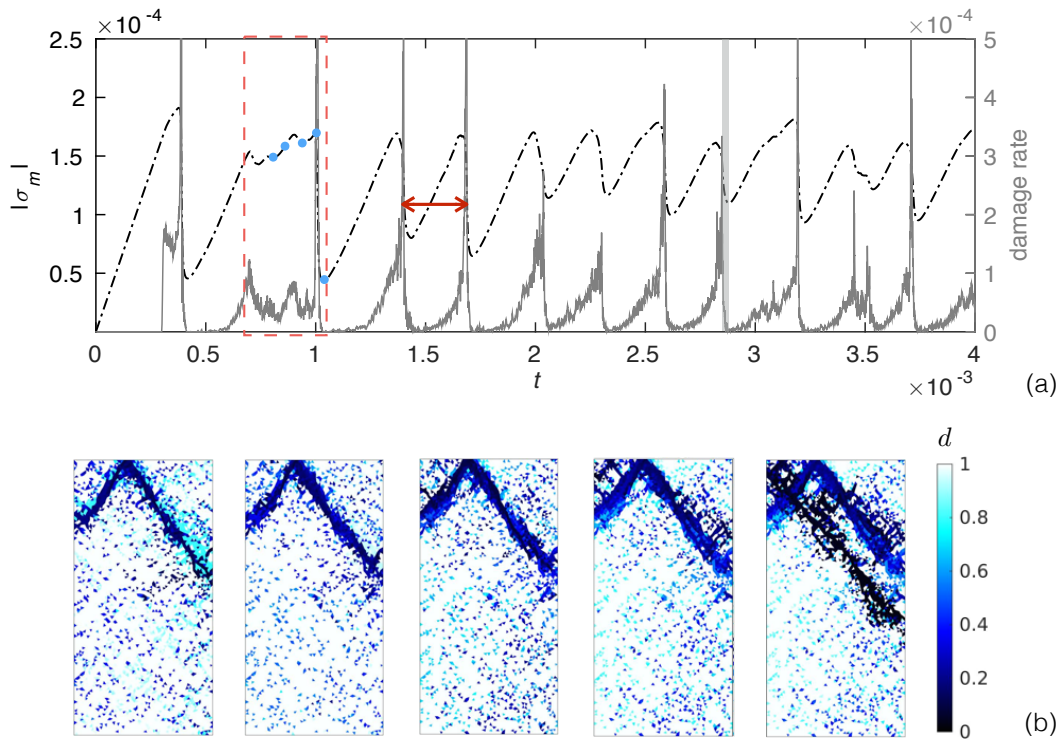

**Figure 8.** (a) Macroscopic stress (black dashed-dotted line) and damage rate (solid grey line) as a function of time for one realization of the uniaxial compression experiment with  $N = 40$ . The dashed red box indicates an interval of uninterrupted damaging activity, during which deformation is accommodated by a persisting system of interacting faults. (b) Instantaneous fields of the level of damage at the five times indicated by the blue dots on the macroscopic stress curve, showing the formation of the system of faults (first panel), which remains active for some time (three following panels), until the propagation of a new, non-interacting fault (last panel).

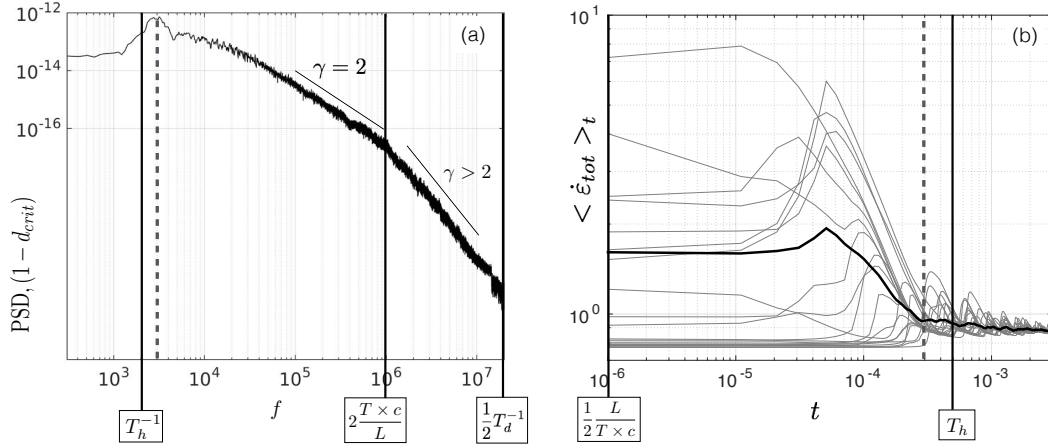

(a) Average power spectral density of the damage rate time series for 5 realizations of the uniaxial compression experiment initialized with different fields of  $C$  and with  $N = 40$ . Blue dashed lines indicate, from left to right, the frequency associated with the characteristic time for healing, the inverse time of propagation of damage across the width of the domain and  $\frac{1}{2} \times$  the frequency associated with the characteristic time for damage. The red dashed line indicates the frequency of the healing and damaging cycle marked with an arrow on Fig. 8(a). (b) Total deformation rate  $\langle \dot{\epsilon}_{tot} \rangle_t$  as a function of the observation time  $t$ , for 20 realizations of the coarse graining calculation centred on different arbitrary times  $t_0$  along a uniaxial compression experiment with  $N = 40$  (coloured lines) and average of the 20 realizations (thick black line).

**Figure 9.** (a) Average power spectral density of the damage rate time series for 5 realizations of the uniaxial compression experiment initialized with different fields of  $C$  and with  $N = 40$ . Vertical solid lines indicate, from left to right, the frequency associated with the characteristic time for healing, the inverse time of propagation of damage across the width of the domain and  $\frac{1}{2} \times$  the frequency associated with the characteristic time for damage. The dashed line indicates the frequency of the healing and damaging cycle marked with a red arrow on Fig. 8(a). (b) Total deformation rate  $\langle \dot{\epsilon}_{tot} \rangle_t$  as a function of the observation time  $t$ , for 20 realizations of the coarse graining calculation centred on different arbitrary times  $t_0$  along a uniaxial compression experiment with  $N = 40$  (thin grey curves) and average of the 20 realizations (thick black curve). The vertical solid lines indicate, from left to right, the time of propagation of damage across the width of the domain and the characteristic time for healing and the dashed line, the period of the healing and damaging cycle marked with a red arrow on Fig. 8(a).

| Parameters                                                               |                            | Values                                                                                                                |
|--------------------------------------------------------------------------|----------------------------|-----------------------------------------------------------------------------------------------------------------------|
| Poisson's ratio                                                          | $\nu$                      | 0.3                                                                                                                   |
| Internal friction coefficient                                            | $\mu$                      | 0.7                                                                                                                   |
| Ice density                                                              | $\rho$                     | $900 \text{ kg m}^{-3}$                                                                                               |
| Shear wave propagation speed                                             | $c$                        | $500 \text{ ms}^{-1}$                                                                                                 |
| Undamaged elastic modulus                                                | $E^0$                      | $2c^2(1 + \nu)\rho \text{ Pa}$                                                                                        |
| Undamaged apparent viscosity                                             | $\eta^0$                   | $10^7 \times E^0 \text{ Pa s}$                                                                                        |
| Minimum apparent viscosity $\eta_{min} \cdot 10^4 \text{ Pa s}$ Cohesion | $C$                        | $(25 - 50) \cdot 10^3 \text{ Pa}$                                                                                     |
| Damage parameter                                                         | $\alpha$                   | 4.0                                                                                                                   |
| Undamaged relaxation time                                                | $\lambda^0$                | $\frac{\eta^0}{E^0} \text{ s}$                                                                                        |
| Characteristic time for damage <a href="#">evolution</a>                 | $t_d$                      | $\Delta t \text{ s}$                                                                                                  |
| Characteristic time for healing                                          | $t_h$                      | $10^5 \text{ s}$                                                                                                      |
| Dimensions of compression experiment                                     |                            | Values                                                                                                                |
| Length of the ice plate                                                  | $L$                        | $200 \cdot 10^3 \text{ m}$                                                                                            |
| Prescribed velocity of forced edge                                       | $U$                        | $10^{-3} \text{ ms}^{-1}$                                                                                             |
| Number of elements along short edge                                      | $N$                        | 10, 20, 40, 80, 100                                                                                                   |
| Mean model resolution                                                    | $\Delta x$                 | $\frac{L}{2N} \text{ m}$                                                                                              |
| Model time step                                                          | $\Delta t$                 | $\frac{\Delta x}{c} \text{ s}$                                                                                        |
| Ice thickness                                                            | $h$                        | 1 m                                                                                                                   |
| Ice concentration                                                        | $A$                        | 100%                                                                                                                  |
| Variables                                                                | Non-dimensional equivalent |                                                                                                                       |
| Horizontal dimension                                                     | $x$                        | $\tilde{x} = \frac{x}{L}$                                                                                             |
| Time                                                                     | $t$                        | $\tilde{t} = \frac{tU}{L}$                                                                                            |
| Ice velocity                                                             | $\mathbf{u}$               | $\tilde{\mathbf{u}} = \frac{\mathbf{u}}{U}$                                                                           |
| Internal stress                                                          | $\sigma$                   | $\tilde{\sigma} = \frac{\sigma}{E^0}$ Level of damage $d$ $\tilde{d} = d$ Ice thickness $h$ $\tilde{h} = \frac{h}{H}$ |

**Table 1.** Model variables, parameters and domain dimensions for the uniaxial compression experiment.
